# Supplementary material for: Survey data of intra-household decision making and smallholder agricultural production in Northern Uganda and Southern Tanzania
Source: PubMed Central journal article supplement (PMC5544471; doi:10.1016/j.dib.2017.07.040), 2017-07-25
Supplement: mmc5.pdf [file mmc5.pdf]

Household ID Male Respondent ID Female Respondent ID 

## General Information

|                                                                 |                          |
|-----------------------------------------------------------------|--------------------------|
| Date (dd/mm/yyyy)                                               |                          |
| Name of Household Head                                          |                          |
| Name of Respondent                                              |                          |
| Name of enumerator                                              |                          |
| Name of second numerator                                        |                          |
| Time the interview started (am/pm)                              |                          |
| Time the interview ended (am/pm)                                |                          |
| Name of Supervisor                                              |                          |
| <b>Geographical location (provided by the site coordinator)</b> |                          |
| Country                                                         |                          |
| District                                                        |                          |
| Sub County                                                      |                          |
| Division                                                        |                          |
| Parish                                                          |                          |
| Village                                                         |                          |
| Latitude                                                        | (N), (S) _____ ° _____ M |
| Longitude                                                       | (E), (W) _____ ° _____ M |
| Elevation (meters)                                              |                          |
| <b>Contact Information and household type</b>                   |                          |
| Telephone or mobile number                                      |                          |
| Type of household (CODE 1)                                      |                          |
| <b>Data entry control and quality</b>                           |                          |
| Name of data entry person (1)                                   |                          |
| Name of data entry person (2)                                   |                          |

## Introduction and Consent

[The objective is to interview a male adult and a female adult that identify themselves as household members that make most of the agricultural decisions. This is typically a husband and wife, however, if the principal decision-maker does not have a spouse but there is another adult in the household that makes agricultural decisions, these two people should be interviewed. There can also be cases where there is only one principal adult decision-maker in the household, in these cases, only interview him/her. Please do NOT replace a decision-maker for another person in the household because they are not available at the time of the interview.]

[Before starting the interview, read aloud the following paragraph and ensure that the respondents understand before asking for their consent.]

"Good morning/afternoon. We are coming from [PARTNER ORGANIZATION'S NAME]. We are conducting a survey to understand how farming decisions are made, what different agricultural practices you use, your household's access to information, extension services, and credit, and your participation in community groups. We would like to share some of this information widely in order that more people understand how food is grown and land managed in this region and the issues that you face regarding access to and use of agricultural information and credit.

Your household was randomly selected for this. Your name will not appear in any data that is made publicly available. The information you provide will be used purely for research purposes; your answers will not affect any benefits or subsidies you may receive now or in the future. Your participation in the survey is voluntary and you do not have to participate if you don't want to. You may withdraw from the study at any time and if there are questions that you would prefer not to answer then we respect your right not to answer them. You may ask questions at any time and if after the survey/interview you have any questions, you can contact [PERSON'S NAME] from [ORGANIZATION] at [PHONE NUMBER].

[IF INTERVIEWING A COUPLE]: This survey has two parts. In the first part, we would like to interview the principal couple in the household together; this part will take approximately one hour. In the second part, we would like to interview the two people separately; this part will take about one hour.

[IF INTERVIEWING ONLY ONE PERSON]: This interview will take about 2 hours.

**Ask the adult male decision-maker:**

Do you consent to provide information? Yes  No

**Ask the adult female decision-maker:**

Do you consent to provide information? Yes  No

Enumerator Signature

\_\_\_\_\_

Household ID

Male Respondent ID

Female Respondent ID

**1. Household Composition (Ask Couple together)**

|                  | 1.1                       | 1.2                                                                                                                                                                                                                                                                   | 1.3                    | 1.4                           | 1.5                                                                                                                                                      | 1.6                                                                                                                                                                                                                                  | 1.7                                                                                                       | 1.8                                                                                                                                                    | 1.9                                                                                                                                                                                                                                                                                                           | 1.10                                                                                                                                                                                                                                     |
|------------------|---------------------------|-----------------------------------------------------------------------------------------------------------------------------------------------------------------------------------------------------------------------------------------------------------------------|------------------------|-------------------------------|----------------------------------------------------------------------------------------------------------------------------------------------------------|--------------------------------------------------------------------------------------------------------------------------------------------------------------------------------------------------------------------------------------|-----------------------------------------------------------------------------------------------------------|--------------------------------------------------------------------------------------------------------------------------------------------------------|---------------------------------------------------------------------------------------------------------------------------------------------------------------------------------------------------------------------------------------------------------------------------------------------------------------|------------------------------------------------------------------------------------------------------------------------------------------------------------------------------------------------------------------------------------------|
| <b>Member ID</b> | Name of household members | What is the relationship to the household head?<br><br>1-Head<br>2-Spouse<br>3-Child<br>4-Step-child<br>5-Child-in-law<br>6-Grandchild<br>7-Parent<br>8-Parent-in-law<br>9-Sibling<br>10-Sibling-in-law<br>11-Other relative<br>12-Other, not relative<br>13-Employee | What year [NAME] born? | Sex<br><br>1-Male<br>2-Female | Marital status<br><br>1 – Married monogamous<br>2- Married-polygamous<br>3 – Separated/<br>Divorced<br>4- Widow/<br>Widower<br>5 – Single, never married | What level of education does [NAME] have?<br><br>0-None → Skip to 1.8<br>1-Primary<br>2-Secondary<br>3-Technical/<br>Vocational(not university)<br>4-University/<br>Diploma<br>University/<br>degree<br>5-Graduate School<br>6-Other | What is the highest year completed at this level?<br><br>(Ask how the highest grade/level/year completed) | Which religion does [NAME] belong to?<br><br>1-Catholic<br>2-Protestant<br>3-Muslim<br>4-Adventist/ SDA<br>5-Pentecostal<br>6.Other<br>7.-None/Atheist | Does [NAME]...<br><br>1-Receives rents<br>2-Receives retirement pension<br>3- Receives subsidy or indemnification from government<br>4-Is a student<br>5-Is disabled or chronically ill<br>6-Is looking for work<br>7- Remittances<br>8- None of the above<br>9-Others (Specify)<br><br>[MARK ALL THAT APPLY] | What activity or occupation does [NAME] dedicate most of his/her time in a typical week?<br>(Occupation is that in which they spend most of their time. Homemaker and/or student are valid occupations for the purposes of this survey.) |
|                  |                           |                                                                                                                                                                                                                                                                       | <b>Code</b>            | <b>Year</b>                   | <b>Code</b>                                                                                                                                              | <b>Code</b>                                                                                                                                                                                                                          | <b>Code</b>                                                                                               | <b>Year</b>                                                                                                                                            | <b>Code</b>                                                                                                                                                                                                                                                                                                   | <b>Code</b>                                                                                                                                                                                                                              |
| ID1              |                           |                                                                                                                                                                                                                                                                       |                        |                               |                                                                                                                                                          |                                                                                                                                                                                                                                      |                                                                                                           |                                                                                                                                                        |                                                                                                                                                                                                                                                                                                               |                                                                                                                                                                                                                                          |
| ID2              |                           |                                                                                                                                                                                                                                                                       |                        |                               |                                                                                                                                                          |                                                                                                                                                                                                                                      |                                                                                                           |                                                                                                                                                        |                                                                                                                                                                                                                                                                                                               |                                                                                                                                                                                                                                          |
| ID3              |                           |                                                                                                                                                                                                                                                                       |                        |                               |                                                                                                                                                          |                                                                                                                                                                                                                                      |                                                                                                           |                                                                                                                                                        |                                                                                                                                                                                                                                                                                                               |                                                                                                                                                                                                                                          |
| ID4              |                           |                                                                                                                                                                                                                                                                       |                        |                               |                                                                                                                                                          |                                                                                                                                                                                                                                      |                                                                                                           |                                                                                                                                                        |                                                                                                                                                                                                                                                                                                               |                                                                                                                                                                                                                                          |
| ID5              |                           |                                                                                                                                                                                                                                                                       |                        |                               |                                                                                                                                                          |                                                                                                                                                                                                                                      |                                                                                                           |                                                                                                                                                        |                                                                                                                                                                                                                                                                                                               |                                                                                                                                                                                                                                          |
| ID6              |                           |                                                                                                                                                                                                                                                                       |                        |                               |                                                                                                                                                          |                                                                                                                                                                                                                                      |                                                                                                           |                                                                                                                                                        |                                                                                                                                                                                                                                                                                                               |                                                                                                                                                                                                                                          |
| ID7              |                           |                                                                                                                                                                                                                                                                       |                        |                               |                                                                                                                                                          |                                                                                                                                                                                                                                      |                                                                                                           |                                                                                                                                                        |                                                                                                                                                                                                                                                                                                               |                                                                                                                                                                                                                                          |
| ID8              |                           |                                                                                                                                                                                                                                                                       |                        |                               |                                                                                                                                                          |                                                                                                                                                                                                                                      |                                                                                                           |                                                                                                                                                        |                                                                                                                                                                                                                                                                                                               |                                                                                                                                                                                                                                          |
| ID9              |                           |                                                                                                                                                                                                                                                                       |                        |                               |                                                                                                                                                          |                                                                                                                                                                                                                                      |                                                                                                           |                                                                                                                                                        |                                                                                                                                                                                                                                                                                                               |                                                                                                                                                                                                                                          |
| ID10             |                           |                                                                                                                                                                                                                                                                       |                        |                               |                                                                                                                                                          |                                                                                                                                                                                                                                      |                                                                                                           |                                                                                                                                                        |                                                                                                                                                                                                                                                                                                               |                                                                                                                                                                                                                                          |
| ID11             |                           |                                                                                                                                                                                                                                                                       |                        |                               |                                                                                                                                                          |                                                                                                                                                                                                                                      |                                                                                                           |                                                                                                                                                        |                                                                                                                                                                                                                                                                                                               |                                                                                                                                                                                                                                          |
| ID12             |                           |                                                                                                                                                                                                                                                                       |                        |                               |                                                                                                                                                          |                                                                                                                                                                                                                                      |                                                                                                           |                                                                                                                                                        |                                                                                                                                                                                                                                                                                                               |                                                                                                                                                                                                                                          |

Household ID Male Respondent ID Female Respondent ID 

## 2. Labor Characteristics (Ask only for the 2 respondents)

|     | 2.1                                                                                                                                                                                                                                                                                                       | 2.2                                                                                       | 2.3                                                                           | 2.4                                                                                                                                                         | 2.5                                                                                      |
|-----|-----------------------------------------------------------------------------------------------------------------------------------------------------------------------------------------------------------------------------------------------------------------------------------------------------------|-------------------------------------------------------------------------------------------|-------------------------------------------------------------------------------|-------------------------------------------------------------------------------------------------------------------------------------------------------------|------------------------------------------------------------------------------------------|
| ID  | 2.6 In your job you are...?<br>2.7<br>2.8<br><b>[READ THE ALTERNATIVES, CHOOSE ONLY ONE]</b><br>1- Owner or partner<br>2- Self-employed<br>3- Unpaid family laborer<br>4- Government employee or worker<br>5- Private employee or worker<br>6- Day laborer<br>7- Domestic employee (maid, gardener, etc.) | 2.9 Approximately how many hours do you work in a typical day in this occupation?<br>2.10 | 2.11 In a typical week, how many days do you work in this occupation?<br>2.12 | 2.13 How many months has [NAME] worked in this occupation in the last year? (If they answer all year; that's 12 months and less than one month should be 0) | 2.14 How many years of experience does [NAME] have working in this activity/ occupation? |
|     | <b>Position</b>                                                                                                                                                                                                                                                                                           | <b>Hours</b>                                                                              | <b>Days</b>                                                                   | <b>Months</b>                                                                                                                                               | <b>Years</b>                                                                             |
| ID1 |                                                                                                                                                                                                                                                                                                           |                                                                                           |                                                                               |                                                                                                                                                             |                                                                                          |
| ID2 |                                                                                                                                                                                                                                                                                                           |                                                                                           |                                                                               |                                                                                                                                                             |                                                                                          |

Household ID Male Respondent ID Female Respondent ID 

|     |                                                                                                             |                                 |                                                                                                                                                                                                                                                                                                           |                                                                                      |                                                                           |                                                                   |                                                                                                                                                                                                                                                                                                                                                       |                                                                                 |                                                                       |
|-----|-------------------------------------------------------------------------------------------------------------|---------------------------------|-----------------------------------------------------------------------------------------------------------------------------------------------------------------------------------------------------------------------------------------------------------------------------------------------------------|--------------------------------------------------------------------------------------|---------------------------------------------------------------------------|-------------------------------------------------------------------|-------------------------------------------------------------------------------------------------------------------------------------------------------------------------------------------------------------------------------------------------------------------------------------------------------------------------------------------------------|---------------------------------------------------------------------------------|-----------------------------------------------------------------------|
| ID  | Besides the activity just described, do you have a second occupation?<br><br>1-Yes<br><br>2-No → go to 2.12 | What is your second occupation? | In your job you are...?<br><br><b>[READ THE ALTERNATIVES, CHOOSE ONLY ONE]</b><br><br>1- Owner or partner<br>2- Self-employed<br>3- Unpaid family laborer/homemaker<br>4- Government employee or worker<br>5- Private employee or worker<br>6- Day laborer<br>7- Domestic employee (maid, gardener, etc.) | Approximately, how many hours do you work in a typical day this (second) occupation? | In a typical week, how many days do you work in this (second) occupation? | How many months did you work in this occupation in the last year? | <b>[IF THE RESPONSE IN 2.1 or 2.7 IS "HOMEMAKER", DO NOT ASK THIS QUESTION, BUT WRITE 1 IN THIS QUESTION AND IN 2.14 WRITE THE NUMBER OF HOURS REPORTED IN 2.4.]</b><br><br>Does [NAME] participate in the household chores (including cooking, fire wood collection, maintenance, childcare, carrying water etc.?<br><br>1- Yes<br>2- No → go to 3.1 | Approximately, how many hours do you work in these activities in a typical day? | In a typical week, how many days do you do these types of activities? |
|     | <b>CODE</b>                                                                                                 | <b>OCCUPATION</b>               | <b>CODE</b>                                                                                                                                                                                                                                                                                               | <b>HOURS</b>                                                                         | <b>DAYS</b>                                                               | <b>MONTHS</b>                                                     | <b>CODE</b>                                                                                                                                                                                                                                                                                                                                           | <b>HOURS</b>                                                                    | <b>DAYS</b>                                                           |
| ID1 |                                                                                                             |                                 |                                                                                                                                                                                                                                                                                                           |                                                                                      |                                                                           |                                                                   |                                                                                                                                                                                                                                                                                                                                                       |                                                                                 |                                                                       |
| ID2 |                                                                                                             |                                 |                                                                                                                                                                                                                                                                                                           |                                                                                      |                                                                           |                                                                   |                                                                                                                                                                                                                                                                                                                                                       |                                                                                 |                                                                       |

**3.**  
**Dwelling**  
**Characteristics and**  
**Well-being**  
**Indicators**

|                                                                            |                                                                                         |                                                                                                                                                                                                                                                                                                |                                                                                                                                                    |                                                                                                          |                                                                                                                                                                                                                                                                       |                                                                                                                                                                                                    |                                                                                                                                                                                                                     |                                                                                                                                                                                                                                                                                                     |
|----------------------------------------------------------------------------|-----------------------------------------------------------------------------------------|------------------------------------------------------------------------------------------------------------------------------------------------------------------------------------------------------------------------------------------------------------------------------------------------|----------------------------------------------------------------------------------------------------------------------------------------------------|----------------------------------------------------------------------------------------------------------|-----------------------------------------------------------------------------------------------------------------------------------------------------------------------------------------------------------------------------------------------------------------------|----------------------------------------------------------------------------------------------------------------------------------------------------------------------------------------------------|---------------------------------------------------------------------------------------------------------------------------------------------------------------------------------------------------------------------|-----------------------------------------------------------------------------------------------------------------------------------------------------------------------------------------------------------------------------------------------------------------------------------------------------|
| 3.1                                                                        | 3.2                                                                                     | 3.3                                                                                                                                                                                                                                                                                            | 3.4                                                                                                                                                | 3.5                                                                                                      | 3.6                                                                                                                                                                                                                                                                   | 3.7                                                                                                                                                                                                | 3.8                                                                                                                                                                                                                 | 3.9                                                                                                                                                                                                                                                                                                 |
| How many years has your household lived here in this village continuously? | Does every household member have at least two sets of clothes?<br><br>1 – Yes<br>2 – No | Type of house/ dwelling?<br><br><b>[Don't ask directly, mark according to observation]</b><br><br>1-Independent House<br>2-Tenement (Muzigo)<br>3-Independent flat/ apartment<br>4-Sharing house/ flat/ apartment<br>5-Boys quarters<br>6- Garage<br>7- Hut<br>8- Uniport<br>9- Other, specify | How many rooms does this household occupy?<br><br><b>[Not including kitchen, bathrooms, garages, or rooms dedicated exclusively for business.]</b> | How many square meters is the dwelling?<br><br><b>[Or use local unit/ measure and specify it below.]</b> | What is the main construction material used for the outside walls?<br><br>1- Thatch, straw<br>2- Mud and poles<br>3- Timber<br>4- Un-burnt bricks<br>5- Burnt bricks with mud<br>6- Burnt bricks with cement<br>7- Cement and blocks<br>8- Stone<br>9- Other, specify | What is the main construction material of the floor of the dwelling?<br><br>1- Earth<br>2-Earth and cow dung<br>3-Cement<br>4-Mosaic or tiles<br>5-Bricks<br>6-Stone<br>7-Wood<br>8-Other, specify | What is the main material used for the roof of the dwelling?<br><br>1 Thatch, straw<br>2 Mud<br>3 Wood<br>4 Iron sheets<br>5 Asbestos<br>6 Tiles<br>7 Tin<br>8 Concrete/ Cement<br>9 Tarpaulin<br>10 Other, specify | What type of toilet is mainly used by your household?<br><br>1. Covered pit latrine-private<br>2. Covered pit latrine-shared<br>3. VIP latrine- private<br>4. VIP latrine-shared<br>5. Uncovered pit latrine<br>6. Flush toilet- private<br>7. Flush toilet- shared<br>8. Bush<br>9. Other, specify |
| <b>YEARS</b>                                                               | <b>CODE</b>                                                                             | <b>CODE</b>                                                                                                                                                                                                                                                                                    | <b>No. ROOMS</b>                                                                                                                                   | <b>METERS SQUARED</b>                                                                                    | <b>CODE</b>                                                                                                                                                                                                                                                           | <b>CODE</b>                                                                                                                                                                                        | <b>CODE</b>                                                                                                                                                                                                         | <b>CODE</b>                                                                                                                                                                                                                                                                                         |
|                                                                            |                                                                                         |                                                                                                                                                                                                                                                                                                |                                                                                                                                                    |                                                                                                          |                                                                                                                                                                                                                                                                       |                                                                                                                                                                                                    |                                                                                                                                                                                                                     |                                                                                                                                                                                                                                                                                                     |

Household ID Male Respondent ID Female Respondent ID 

| Season       | 3.11                                                                                                                                                                                                                                                                                                                                                                                                                                                                           | 3.12                                                                                                                                                                                                                             | 3.13                                                                                                                               | 3.14                                                                                                                                                                                      | 3.15                                                                                                                                                                                                                                        | 3.16                                                                           |  |  |  |  |
|--------------|--------------------------------------------------------------------------------------------------------------------------------------------------------------------------------------------------------------------------------------------------------------------------------------------------------------------------------------------------------------------------------------------------------------------------------------------------------------------------------|----------------------------------------------------------------------------------------------------------------------------------------------------------------------------------------------------------------------------------|------------------------------------------------------------------------------------------------------------------------------------|-------------------------------------------------------------------------------------------------------------------------------------------------------------------------------------------|---------------------------------------------------------------------------------------------------------------------------------------------------------------------------------------------------------------------------------------------|--------------------------------------------------------------------------------|--|--|--|--|
|              | What is the principal source of lighting of the dwelling in [SEASON]?<br><br>1- Electricity from a Public Electric Company<br>2- Electricity from a Private Electric Plant<br>3- Electricity from a Generator<br>4- Solar Panels<br>5- Tadooba<br>6- Candle<br>7- Rechargeable lamp<br>8- Gas<br>9- Liquid fuel (kerosene, petrol)<br>10- Candle or battery powered source<br>11- Wood, sawdust or other natural material<br>12- None<br>13- Other, specify<br><br><b>CODE</b> | What is the principal source of energy for cooking in [SEASON]?<br><br>1-Firewood<br>2-Dung<br>3. Crop residue<br>4. Kerosene<br>5. LP Gas<br>6. Charcoal<br>7. Solar<br>8. Electricity<br>9. -Other, specify<br><br><b>CODE</b> | Do you use another energy source for cooking in [SEASON]?<br><br>1-Yes → Continue to 3.14<br>2-No → Next season<br><br><b>CODE</b> | What is the other source?<br><br>1-Firewood<br>2-Dung<br>3. Crop residue<br>4. Kerosene<br>5. LP Gas<br>6. Charcoal<br>7. Solar<br>8. Electricity<br>9. Other, specify<br><br><b>CODE</b> | <b>[If they respond 1 – firewood in 3.12 or 3.14, ask the following. If not, write “n/a” and continue with next season.]</b><br><br>How much time do household members spend in a day collecting and carrying firewood?<br><br><b>HOURS</b> | Who is responsible for collecting and carrying the firewood?<br><br><b>IDs</b> |  |  |  |  |
| Rainy season |                                                                                                                                                                                                                                                                                                                                                                                                                                                                                |                                                                                                                                                                                                                                  |                                                                                                                                    |                                                                                                                                                                                           |                                                                                                                                                                                                                                             |                                                                                |  |  |  |  |
| Dry season   |                                                                                                                                                                                                                                                                                                                                                                                                                                                                                |                                                                                                                                                                                                                                  |                                                                                                                                    |                                                                                                                                                                                           |                                                                                                                                                                                                                                             |                                                                                |  |  |  |  |

| Season | 3.17                                                                                                                                                                                                                                                                                                                                                                                               | 3.18                                                                                                |                    | 3.19                                                                   |  |  |  | 3.20                                                                                                        | 3.21                                                                                    |
|--------|----------------------------------------------------------------------------------------------------------------------------------------------------------------------------------------------------------------------------------------------------------------------------------------------------------------------------------------------------------------------------------------------------|-----------------------------------------------------------------------------------------------------|--------------------|------------------------------------------------------------------------|--|--|--|-------------------------------------------------------------------------------------------------------------|-----------------------------------------------------------------------------------------|
|        | Where does the household get its drinking water in [SEASON]?<br><br>1. Private connection to pipeline (tap) → Skip to 4.1<br>2. Public taps<br>3. Bore-hole<br>4. Protected well/ spring<br>5. Unprotected well/ spring<br>6. River, stream, lake, pond<br>7. Vendor/ Tanker truck → Skip to 4.1<br>8. Gravity flow scheme<br>9. Rain water → Skip to 4.1<br>10. Other, specify<br><br><b>CODE</b> | How long does it take to collect the drinking water from this source?<br><br><b>Time in MINUTES</b> |                    | Who collects and carries the water from this source?<br><br><b>IDs</b> |  |  |  | How much time do household members take collecting and carrying water in a typical day?<br><br><b>HOURS</b> | How many days per week do household members collect and carry water?<br><br><b>DAYS</b> |
|        |                                                                                                                                                                                                                                                                                                                                                                                                    |                                                                                                     | <b>To and From</b> | <b>Waiting Time</b>                                                    |  |  |  |                                                                                                             |                                                                                         |
| Rainy  |                                                                                                                                                                                                                                                                                                                                                                                                    |                                                                                                     |                    |                                                                        |  |  |  |                                                                                                             |                                                                                         |
| Dry    |                                                                                                                                                                                                                                                                                                                                                                                                    |                                                                                                     |                    |                                                                        |  |  |  |                                                                                                             |                                                                                         |

Household ID Male Respondent ID Female Respondent ID **4. Household Assets (Ask the couple together)**

| Asset                       | 4.1                                                                                                                       | 4.2                                |  |  |  | 4.3                                                                          | 4.4                                           |  |  |  | 4.5                                                                                                                                           |
|-----------------------------|---------------------------------------------------------------------------------------------------------------------------|------------------------------------|--|--|--|------------------------------------------------------------------------------|-----------------------------------------------|--|--|--|-----------------------------------------------------------------------------------------------------------------------------------------------|
|                             | Does a household member own [ASSET]?<br><br>1-Yes → go to 4.2<br><br>2-No → next asset<br>Create code for joint ownership | Who are the owners of the [ASSET]? |  |  |  | Is there an ownership document?<br><br>1-Yes → go to 4.4<br>2-No → go to 4.5 | Whose names appear on the document as owners? |  |  |  | How was the [ASSET] acquired?<br><br>1-Constructed<br>2-Purchased<br>3-Inherited<br>4-It was a donation<br>5 I started it<br>6-Other, specify |
|                             | CODE                                                                                                                      | IDs                                |  |  |  | CODE                                                                         | IDs                                           |  |  |  | CODE                                                                                                                                          |
| House (Principal Residence) |                                                                                                                           |                                    |  |  |  |                                                                              |                                               |  |  |  |                                                                                                                                               |
| Other House                 |                                                                                                                           |                                    |  |  |  |                                                                              |                                               |  |  |  |                                                                                                                                               |
| Non-Agricultural Lot        |                                                                                                                           |                                    |  |  |  |                                                                              |                                               |  |  |  |                                                                                                                                               |
| Business                    |                                                                                                                           |                                    |  |  |  |                                                                              |                                               |  |  |  |                                                                                                                                               |

Household ID Male Respondent ID Female Respondent ID 

|                                                         | 4.7<br>Does anyone in the household have [ASSET]?<br><br>1-Yes → go to 4.8<br>2-No → next asset | 4.8<br>How many [ASSET] do you have (in the household)? | 4.9<br>Who is/are the owner(s) of the [ASSET]? |  |  |  | Notes / Comments |
|---------------------------------------------------------|-------------------------------------------------------------------------------------------------|---------------------------------------------------------|------------------------------------------------|--|--|--|------------------|
|                                                         | CODE                                                                                            | NUMBER                                                  | IDs                                            |  |  |  |                  |
| Gas or Electric stove                                   |                                                                                                 |                                                         |                                                |  |  |  |                  |
| Refrigerator                                            |                                                                                                 |                                                         |                                                |  |  |  |                  |
| Washing machine                                         |                                                                                                 |                                                         |                                                |  |  |  |                  |
| Blender                                                 |                                                                                                 |                                                         |                                                |  |  |  |                  |
| Radio                                                   |                                                                                                 |                                                         |                                                |  |  |  |                  |
| Television                                              |                                                                                                 |                                                         |                                                |  |  |  |                  |
| DVD Player                                              |                                                                                                 |                                                         |                                                |  |  |  |                  |
| Mobile phone                                            |                                                                                                 |                                                         |                                                |  |  |  |                  |
| Furniture (i.e. Living Room and/or dining room set)     |                                                                                                 |                                                         |                                                |  |  |  |                  |
| Sewing machine                                          |                                                                                                 |                                                         |                                                |  |  |  |                  |
| Computer                                                |                                                                                                 |                                                         |                                                |  |  |  |                  |
| Fan                                                     |                                                                                                 |                                                         |                                                |  |  |  |                  |
| Car / Pick-up truck                                     |                                                                                                 |                                                         |                                                |  |  |  |                  |
| Motorcycle                                              |                                                                                                 |                                                         |                                                |  |  |  |                  |
| Bicycle                                                 |                                                                                                 |                                                         |                                                |  |  |  |                  |
| Generator (electricity)                                 |                                                                                                 |                                                         |                                                |  |  |  |                  |
| Water pump                                              |                                                                                                 |                                                         |                                                |  |  |  |                  |
| Water tank                                              |                                                                                                 |                                                         |                                                |  |  |  |                  |
| Solar Panel                                             |                                                                                                 |                                                         |                                                |  |  |  |                  |
| Wheel barrow                                            |                                                                                                 |                                                         |                                                |  |  |  |                  |
| Small agricultural tools                                |                                                                                                 |                                                         |                                                |  |  |  |                  |
| Tractor                                                 |                                                                                                 |                                                         |                                                |  |  |  |                  |
| Plough / Harvester / Other machinery implements         |                                                                                                 |                                                         |                                                |  |  |  |                  |
| Sprayer                                                 |                                                                                                 |                                                         |                                                |  |  |  |                  |
| Dairy shed/Cattle Boma, Goats Pen / Chicken coup / etc. |                                                                                                 |                                                         |                                                |  |  |  |                  |
| Mill                                                    |                                                                                                 |                                                         |                                                |  |  |  |                  |
| Groundnut Sheller                                       |                                                                                                 |                                                         |                                                |  |  |  |                  |
| Other, specify                                          |                                                                                                 |                                                         |                                                |  |  |  |                  |

Household ID

Male Respondent ID

Female Respondent ID

## Section 5: Food Security

*I would now like to ask you to describe a typical food year for your household. For each month say whether the food you consume is mainly from your own farm or from other sources. In addition, which months if any you tend to find you do not have enough food to eat for your family.*

JAN FEB MAR APR MAY JUN JUL AUG SEP OCT NOV DEC

5.1. Source of food

*FDSC Codes for Q1: 1=Mainly from own farm, 2=Mainly from off farm (purchase/aid/other)*

5.2. Shortage /struggle to feed the family

*HUNG Codes for Q2: 1=Shortage, 0=No shortage*



Household ID Male Respondent ID Female Respondent ID 

## 6. Credit and Insurance

| 6.1                                                                                                                                        | 6.2                                                                   | 6.3                                                                                                                                    |
|--------------------------------------------------------------------------------------------------------------------------------------------|-----------------------------------------------------------------------|----------------------------------------------------------------------------------------------------------------------------------------|
| Did anyone in your household ask for (or apply) for a loan or other type of credit in the last 12 months?<br><br>1-Yes<br>2-No → go to 6.4 | Was the credit obtained?<br><br>1-Yes → go to 6.3<br>2-No → go to 6.4 | Are you currently paying off the debt or is it already paid?<br><br>1-We're still paying<br>2-We already paid it off<br><br>>go to 6.4 |
| <b>CODE</b>                                                                                                                                | <b>CODE</b>                                                           | <b>CODE</b>                                                                                                                            |
|                                                                                                                                            |                                                                       |                                                                                                                                        |

[Fill in this table with all the debts that the household has CURRENTLY, if in 6.3 they responded “We’re still paying” this debt should appear in the table. Be sure to ask for all current debts.]

|                  | 6.4                                                                                                                                                                                                      | 6.5                                                  | 6.6                                                                                                                                                                                                                                                                                                                          | 6.7                                    | 6.8                                      | 6.9                                 | 6.10                               |                |            |  |  |
|------------------|----------------------------------------------------------------------------------------------------------------------------------------------------------------------------------------------------------|------------------------------------------------------|------------------------------------------------------------------------------------------------------------------------------------------------------------------------------------------------------------------------------------------------------------------------------------------------------------------------------|----------------------------------------|------------------------------------------|-------------------------------------|------------------------------------|----------------|------------|--|--|
| <b>Debt Code</b> | Currently does any household member have a loan or owe someone money?<br><br>1-Yes → describe the debt and continue with 6.5<br>2-No → go to 6.11<br><br><b>[[If they respond 1, describe the debt.]</b> | Who in the household are responsible for the credit? | What is the source of the loan/ credit?<br>1-Family<br>2-Friend<br>3-Employer/Boss/Salary advance<br>4-Private Bank<br>5-Government owned bank (Agrarian bank)<br>6-Cooperative<br>7-Other private institution / NGO<br>8-Moneylender<br>9-Business/store<br>10-Informal credit group<br>11-Credit card<br>12-Other, specify | In what year did you receive the loan? | What was the initial amount of the debt? | What was the purpose of the credit? | Who decided to ask for the credit? |                |            |  |  |
|                  | <b>DESCRIPTION</b>                                                                                                                                                                                       | <b>IDs</b>                                           |                                                                                                                                                                                                                                                                                                                              |                                        | <b>CODE</b>                              | <b>YEAR</b>                         | <b>AMOUNT UGS</b>                  | <b>PURPOSE</b> | <b>IDs</b> |  |  |
| D1               |                                                                                                                                                                                                          |                                                      |                                                                                                                                                                                                                                                                                                                              |                                        |                                          |                                     |                                    |                |            |  |  |
| D2               |                                                                                                                                                                                                          |                                                      |                                                                                                                                                                                                                                                                                                                              |                                        |                                          |                                     |                                    |                |            |  |  |
| D3               |                                                                                                                                                                                                          |                                                      |                                                                                                                                                                                                                                                                                                                              |                                        |                                          |                                     |                                    |                |            |  |  |
| D4               |                                                                                                                                                                                                          |                                                      |                                                                                                                                                                                                                                                                                                                              |                                        |                                          |                                     |                                    |                |            |  |  |
| D5               |                                                                                                                                                                                                          |                                                      |                                                                                                                                                                                                                                                                                                                              |                                        |                                          |                                     |                                    |                |            |  |  |

Household ID

Male Respondent ID

Female Respondent ID

**Insurance Questions**

| Type of insurance          | 6.11<br>Does anyone in the household have [INSURANCE]?<br>1-Yes → go to 6.12<br>2-No → go to 6.13 | 6.12<br>Who has the insurance? |  |  |  |  |  | 6.13<br>Why didn't you buy crop insurance?<br>1- Don't know about it<br>2- It's not available<br>3- It's not necessary<br>4-We don't have funds to buy it<br>5-Bad experiences in the past<br>6-Other, specify |
|----------------------------|---------------------------------------------------------------------------------------------------|--------------------------------|--|--|--|--|--|----------------------------------------------------------------------------------------------------------------------------------------------------------------------------------------------------------------|
|                            | CODE                                                                                              | IDs                            |  |  |  |  |  |                                                                                                                                                                                                                |
| Crop Insurance             |                                                                                                   |                                |  |  |  |  |  |                                                                                                                                                                                                                |
| Livestock Insurance        |                                                                                                   |                                |  |  |  |  |  |                                                                                                                                                                                                                |
| Health Insurance – public  |                                                                                                   |                                |  |  |  |  |  |                                                                                                                                                                                                                |
| Health Insurance – private |                                                                                                   |                                |  |  |  |  |  |                                                                                                                                                                                                                |
| Funeral Insurance          |                                                                                                   |                                |  |  |  |  |  |                                                                                                                                                                                                                |
| Life Insurance             |                                                                                                   |                                |  |  |  |  |  |                                                                                                                                                                                                                |
| Home Owner Insurance       |                                                                                                   |                                |  |  |  |  |  |                                                                                                                                                                                                                |
| Vehicle Insurance          |                                                                                                   |                                |  |  |  |  |  |                                                                                                                                                                                                                |

Household ID

Male Respondent ID

Female Respondent ID

**7a. Sketch of the Farm (*to be done jointly by the couple*) -**

Please sketch a quick map of all the plots that your household used throughout the past 12 months (OR ASK IF THEY HAVE A DRAWING OF THE FARM). This drawing should indicate a sketch of the farm, including intercropping and the seasonality when different crops appear in plots. It also includes ponds or grazing areas owned by the household. DO NOT FORGET TO ASK ABOUT PLOTS THAT ARE NOT OWNED BUT MAY BE RENTED, BORROWED, OR OTHERWISE USED BY THE HOUSEHOLD. This is to be done with both the male and female respondent together. Both enumerators—and their respondents—should agree on the number and order of the subplots that they have included.

Household ID Male Respondent ID Female Respondent ID **7b. Land Ownership and Production (Ask the couple together)**

| 7.1                                                                                                                                              | 7.2                             | 7.3                                                  | 7.4                                                                                                           |      | 7.5                                                                                                                                                                                                                                                                                                                                                                                           | 7.6                                                                           | 7.7                                                                                                                                     | 7.8                                                                                                    | 7.9                                                                                                                                                                                                | 7.10                                              | 7.11                                                                                                                                                           |     |    |
|--------------------------------------------------------------------------------------------------------------------------------------------------|---------------------------------|------------------------------------------------------|---------------------------------------------------------------------------------------------------------------|------|-----------------------------------------------------------------------------------------------------------------------------------------------------------------------------------------------------------------------------------------------------------------------------------------------------------------------------------------------------------------------------------------------|-------------------------------------------------------------------------------|-----------------------------------------------------------------------------------------------------------------------------------------|--------------------------------------------------------------------------------------------------------|----------------------------------------------------------------------------------------------------------------------------------------------------------------------------------------------------|---------------------------------------------------|----------------------------------------------------------------------------------------------------------------------------------------------------------------|-----|----|
| Plot number<br><br><b>[Refer to sketch.]</b><br><br>5.1.1 How many plots does the household have, including gardens?<br><br><input type="text"/> | Description or name of the plot | How many meters away from the household is the plot? | What is the area of the plot?<br><br>UNIT OF MEASURE:<br>1- Hectare<br>2-Square meters<br>3 - Acre<br>4- Tall |      | What is the tenure of the plot?<br><br>1-Owned and worked by household members → go to 7.6<br>2-Owned and rented out → go to 7.6<br>3-Owned and sharecropped out → go to 7.6<br>4-Owned and lent/ borrowed out → go to 7.6<br>5-Not owned, rented in → go to 7.11<br>6-Not owned, sharecropped in → go to 7.11<br>7-Not owned, borrowed → Skip to 7.11<br>8-Communal land<br>9-Other, specify | Who is/are the owner(s) of the plot?<br><br>USE HHID from HH roster on page 2 | How was the plot acquired?<br><br>1-Purchased<br>2-Customary /Inherited<br>3-It was a donation / gift<br>4-Communal<br>5-Other, specify | Do you have a title or other property document?<br><br>1-Yes → continue to 7.9<br><br>3-No →go to 7.11 | What type of property document do you have?<br><br>1-Land Title<br>2 Lease document<br>3-Certificate of Customary Ownership<br>4.Sales Agreement<br>5. No Document (Skip to 7.11)6- Other, specify | Whose names are listed on the document as owners? | Who makes the major decisions regarding resource use and manages control over agricultural production on this plot?<br><br><b>[LIST ONLY ONE PERSON HERE.]</b> |     |    |
|                                                                                                                                                  | NAME / DESCRIPTION              | METERS/KM                                            | #                                                                                                             | UNIT | CODE                                                                                                                                                                                                                                                                                                                                                                                          | IDs                                                                           |                                                                                                                                         |                                                                                                        | CODE                                                                                                                                                                                               | CODE                                              | CODE                                                                                                                                                           | IDs | ID |
| P1                                                                                                                                               |                                 |                                                      |                                                                                                               |      |                                                                                                                                                                                                                                                                                                                                                                                               |                                                                               |                                                                                                                                         |                                                                                                        |                                                                                                                                                                                                    |                                                   |                                                                                                                                                                |     |    |
| P2                                                                                                                                               |                                 |                                                      |                                                                                                               |      |                                                                                                                                                                                                                                                                                                                                                                                               |                                                                               |                                                                                                                                         |                                                                                                        |                                                                                                                                                                                                    |                                                   |                                                                                                                                                                |     |    |
| P3                                                                                                                                               |                                 |                                                      |                                                                                                               |      |                                                                                                                                                                                                                                                                                                                                                                                               |                                                                               |                                                                                                                                         |                                                                                                        |                                                                                                                                                                                                    |                                                   |                                                                                                                                                                |     |    |
| P4                                                                                                                                               |                                 |                                                      |                                                                                                               |      |                                                                                                                                                                                                                                                                                                                                                                                               |                                                                               |                                                                                                                                         |                                                                                                        |                                                                                                                                                                                                    |                                                   |                                                                                                                                                                |     |    |
| P5                                                                                                                                               |                                 |                                                      |                                                                                                               |      |                                                                                                                                                                                                                                                                                                                                                                                               |                                                                               |                                                                                                                                         |                                                                                                        |                                                                                                                                                                                                    |                                                   |                                                                                                                                                                |     |    |
| P6                                                                                                                                               |                                 |                                                      |                                                                                                               |      |                                                                                                                                                                                                                                                                                                                                                                                               |                                                                               |                                                                                                                                         |                                                                                                        |                                                                                                                                                                                                    |                                                   |                                                                                                                                                                |     |    |
| P7                                                                                                                                               |                                 |                                                      |                                                                                                               |      |                                                                                                                                                                                                                                                                                                                                                                                               |                                                                               |                                                                                                                                         |                                                                                                        |                                                                                                                                                                                                    |                                                   |                                                                                                                                                                |     |    |
| P8                                                                                                                                               |                                 |                                                      |                                                                                                               |      |                                                                                                                                                                                                                                                                                                                                                                                               |                                                                               |                                                                                                                                         |                                                                                                        |                                                                                                                                                                                                    |                                                   |                                                                                                                                                                |     |    |
| P9                                                                                                                                               |                                 |                                                      |                                                                                                               |      |                                                                                                                                                                                                                                                                                                                                                                                               |                                                                               |                                                                                                                                         |                                                                                                        |                                                                                                                                                                                                    |                                                   |                                                                                                                                                                |     |    |
| P10                                                                                                                                              |                                 |                                                      |                                                                                                               |      |                                                                                                                                                                                                                                                                                                                                                                                               |                                                                               |                                                                                                                                         |                                                                                                        |                                                                                                                                                                                                    |                                                   |                                                                                                                                                                |     |    |

Household ID Male Respondent ID Female Respondent ID 

| PLOT ID | 7.11                                                                                                                                                                              | 7.12                                                                                        | 7.13                                                                                             | 7.14                                                                                                                                                                                                                    | 7.15                                                                                              | 7.16                                                                                                                                                                                                                                                                                | 7.17                                                                                                                                                                                                                                                                                             | 7.18                                                                                                         |      |
|---------|-----------------------------------------------------------------------------------------------------------------------------------------------------------------------------------|---------------------------------------------------------------------------------------------|--------------------------------------------------------------------------------------------------|-------------------------------------------------------------------------------------------------------------------------------------------------------------------------------------------------------------------------|---------------------------------------------------------------------------------------------------|-------------------------------------------------------------------------------------------------------------------------------------------------------------------------------------------------------------------------------------------------------------------------------------|--------------------------------------------------------------------------------------------------------------------------------------------------------------------------------------------------------------------------------------------------------------------------------------------------|--------------------------------------------------------------------------------------------------------------|------|
|         | Is this plot managed by household members?<br><br>1-Yes<br>2-No<br><br><b>[Do not ask directly. If they respond 1, 5, 6, or 7 in 7.5 write code 1, if not, go the next plot.]</b> | What did you cultivate on this plot in the first season 2014?<br><br>List Three major crops | Is this [CROP] intercropped?<br><br>1-Yes → With what other crop?<br><br>2-No → Continue to 7.14 | How much area was cultivated with this crop(s)?<br><br><b>[Verify that this is not greater than the total plot size in question 5.3.]</b><br><br>UNITS OF MEASURE:<br>1-Hectare<br>2-Square meter<br>3-Acre<br>4 – Tall | Do you irrigate this [CROP] on this subplot?<br><br>1-Yes → continue to 7.16<br>2-No → go to 7.19 | What is the source of water for irrigation?<br><br>1-River, stream<br>2-Canal / channel<br>3-Constructed pond, reservoir, or pan<br>4-Natural lake or pond<br>5-Well, tubewell, or borehole<br>6-Sewerage water<br>7-Spring, natural<br>8-Other, specify<br><br>>continue with 7.17 | What was the extraction method used for irrigation?<br><br>1 – Gravity<br>2 – Treadle/Foot pump<br>3 – Rower/Hand pump<br>4 – Diesel/Petrol pump<br>5 – Electric pump<br>6- Solar Water Pump<br>7- Wind Mills<br>8– Tractor pump<br>9– Bucket/hose<br>Other (specify)<br><br>>continue with 7.18 | Do you pay for irrigation?<br><br>1. Yes, for the pump<br>2. Yes, for the water<br>3. Yes, for both<br>4. No |      |
|         | CODE                                                                                                                                                                              | CROP(S)                                                                                     |                                                                                                  | CROP                                                                                                                                                                                                                    | #                                                                                                 | UNIT                                                                                                                                                                                                                                                                                | CODE                                                                                                                                                                                                                                                                                             | CODE                                                                                                         | CODE |
| P1      |                                                                                                                                                                                   | P1.1                                                                                        |                                                                                                  |                                                                                                                                                                                                                         |                                                                                                   |                                                                                                                                                                                                                                                                                     |                                                                                                                                                                                                                                                                                                  |                                                                                                              |      |
|         |                                                                                                                                                                                   | P1.2                                                                                        |                                                                                                  |                                                                                                                                                                                                                         |                                                                                                   |                                                                                                                                                                                                                                                                                     |                                                                                                                                                                                                                                                                                                  |                                                                                                              |      |
|         |                                                                                                                                                                                   | P1.3                                                                                        |                                                                                                  |                                                                                                                                                                                                                         |                                                                                                   |                                                                                                                                                                                                                                                                                     |                                                                                                                                                                                                                                                                                                  |                                                                                                              |      |
| P2      |                                                                                                                                                                                   | P2.1                                                                                        |                                                                                                  |                                                                                                                                                                                                                         |                                                                                                   |                                                                                                                                                                                                                                                                                     |                                                                                                                                                                                                                                                                                                  |                                                                                                              |      |
|         |                                                                                                                                                                                   | P2.2                                                                                        |                                                                                                  |                                                                                                                                                                                                                         |                                                                                                   |                                                                                                                                                                                                                                                                                     |                                                                                                                                                                                                                                                                                                  |                                                                                                              |      |
|         |                                                                                                                                                                                   | P2.3                                                                                        |                                                                                                  |                                                                                                                                                                                                                         |                                                                                                   |                                                                                                                                                                                                                                                                                     |                                                                                                                                                                                                                                                                                                  |                                                                                                              |      |
| P3      |                                                                                                                                                                                   | P3.1                                                                                        |                                                                                                  |                                                                                                                                                                                                                         |                                                                                                   |                                                                                                                                                                                                                                                                                     |                                                                                                                                                                                                                                                                                                  |                                                                                                              |      |
|         |                                                                                                                                                                                   | P3.2                                                                                        |                                                                                                  |                                                                                                                                                                                                                         |                                                                                                   |                                                                                                                                                                                                                                                                                     |                                                                                                                                                                                                                                                                                                  |                                                                                                              |      |
|         |                                                                                                                                                                                   | P3.3                                                                                        |                                                                                                  |                                                                                                                                                                                                                         |                                                                                                   |                                                                                                                                                                                                                                                                                     |                                                                                                                                                                                                                                                                                                  |                                                                                                              |      |
| P4      |                                                                                                                                                                                   | P4.1                                                                                        |                                                                                                  |                                                                                                                                                                                                                         |                                                                                                   |                                                                                                                                                                                                                                                                                     |                                                                                                                                                                                                                                                                                                  |                                                                                                              |      |
|         |                                                                                                                                                                                   | P4.2                                                                                        |                                                                                                  |                                                                                                                                                                                                                         |                                                                                                   |                                                                                                                                                                                                                                                                                     |                                                                                                                                                                                                                                                                                                  |                                                                                                              |      |
|         |                                                                                                                                                                                   | P4.3                                                                                        |                                                                                                  |                                                                                                                                                                                                                         |                                                                                                   |                                                                                                                                                                                                                                                                                     |                                                                                                                                                                                                                                                                                                  |                                                                                                              |      |
| P5      |                                                                                                                                                                                   | P5.1                                                                                        |                                                                                                  |                                                                                                                                                                                                                         |                                                                                                   |                                                                                                                                                                                                                                                                                     |                                                                                                                                                                                                                                                                                                  |                                                                                                              |      |
|         |                                                                                                                                                                                   | P5.2                                                                                        |                                                                                                  |                                                                                                                                                                                                                         |                                                                                                   |                                                                                                                                                                                                                                                                                     |                                                                                                                                                                                                                                                                                                  |                                                                                                              |      |
|         |                                                                                                                                                                                   | P5.3                                                                                        |                                                                                                  |                                                                                                                                                                                                                         |                                                                                                   |                                                                                                                                                                                                                                                                                     |                                                                                                                                                                                                                                                                                                  |                                                                                                              |      |

Household ID

Male Respondent ID

Female Respondent ID

**For the following tables please have each respondent (male and female) choose two plots that s/he manages or is most involved in the production activities (for a total of 4 sub-plots). List that sub-plot in the first column. It is important that you ensure that the sub-plot matches those listed in the above tables and in the sketch of the farm.**

| PLOTS | SUB-PLOT | 7.19                                                                                                                                                                                      | 7.19b                            | 7.19c                                                            | 7.19d                          | 7.20                                                                                      | 7.20b                           | 7.20c                                                                                                  | 7.20d                          | 7.21                                                                                      | 7.21b                           | 7.21c                                                                                                  | 7.21d                          |
|-------|----------|-------------------------------------------------------------------------------------------------------------------------------------------------------------------------------------------|----------------------------------|------------------------------------------------------------------|--------------------------------|-------------------------------------------------------------------------------------------|---------------------------------|--------------------------------------------------------------------------------------------------------|--------------------------------|-------------------------------------------------------------------------------------------|---------------------------------|--------------------------------------------------------------------------------------------------------|--------------------------------|
|       |          | Did you use fertilizers on this plot in the last year?<br><br>1-Yes, Farmyard manure<br>2- Yes, Compost<br>3-Yes, Inorganic fertilizer?<br>4- Yes, Other, specify<br>5- No → Skip to 7.20 | How much fertilizer did you use? | Unit<br>1. kg<br>2. 50 kg bag<br>3 25 kg bag<br>4 other(specify) | Price per unit if bought (Ush) | Did you use herbicides on this plot in the last year?<br><br>1-Yes<br>2-No → Skip to 7.21 | How much herbicide did you use? | Unit<br>1. 1ltr/kg<br>2. 2ltr/kg<br>3. 5ltr/kg<br>4. 0.25 ltr/kg<br>5. 0.5 ltr/kg<br>6. other(specify) | Price per unit if bought (Ush) | Did you use pesticides on this plot in the last year?<br><br>1-Yes<br>2-No → Skip to 7.22 | How much pesticide did you use? | Unit<br>1. 1ltr/kg<br>2. 2ltr/kg<br>3. 5ltr/kg<br>4. 0.25 ltr/kg<br>5. 0.5 ltr/kg<br>6. other(specify) | Price per unit if bought (Ush) |
|       |          | CODE                                                                                                                                                                                      | AMOUNT                           | CODE                                                             | USH                            | CODE                                                                                      | AMOUNT                          | UNIT                                                                                                   | USH                            | CODE                                                                                      | AMOUNT                          | UNIT                                                                                                   | USH                            |
|       |          |                                                                                                                                                                                           |                                  |                                                                  |                                |                                                                                           |                                 |                                                                                                        |                                |                                                                                           |                                 |                                                                                                        |                                |
|       |          |                                                                                                                                                                                           |                                  |                                                                  |                                |                                                                                           |                                 |                                                                                                        |                                |                                                                                           |                                 |                                                                                                        |                                |
|       |          |                                                                                                                                                                                           |                                  |                                                                  |                                |                                                                                           |                                 |                                                                                                        |                                |                                                                                           |                                 |                                                                                                        |                                |
|       |          |                                                                                                                                                                                           |                                  |                                                                  |                                |                                                                                           |                                 |                                                                                                        |                                |                                                                                           |                                 |                                                                                                        |                                |

Household ID Male Respondent ID Female Respondent ID 

| plots | Sub-Plot | ACTIVITY                                                          | 7.22                                                                                                                                     | 7.23                                                                                                    | 7.24                                                                                                      | 7.25                                                                                                       | 7.25b                                             | 7.26                                                                                                     | 7.26b                                           |
|-------|----------|-------------------------------------------------------------------|------------------------------------------------------------------------------------------------------------------------------------------|---------------------------------------------------------------------------------------------------------|-----------------------------------------------------------------------------------------------------------|------------------------------------------------------------------------------------------------------------|---------------------------------------------------|----------------------------------------------------------------------------------------------------------|-------------------------------------------------|
|       |          | Land preparation<br>Planting<br>Weeding<br>Spraying<br>Harvesting | How many total person-days of work (including family and hired labor) were used on this plot for [ACTIVITY] in the first season of 2014? | How many person-days did female family members work in [ACTIVITY] on this plot in first season of 2014? | How many person-days did male family members work in [ACTIVITY] on this plot in the first season of 2014? | How many person-days were women hired to work in this [ACTIVITY] on this plot in the first season of 2014? | What is the price per person-day of female labor? | How many person-days were men hired to work in this [ACTIVITY] on this plot in the first season of 2014? | What is the price per person-day of male labor? |
|       |          |                                                                   | NUMBER                                                                                                                                   | NUMBER                                                                                                  | NUMBER                                                                                                    | NUMBER                                                                                                     | USH                                               | NUMBER                                                                                                   | USH                                             |
|       |          | Land Preparation                                                  |                                                                                                                                          |                                                                                                         |                                                                                                           |                                                                                                            |                                                   |                                                                                                          |                                                 |
|       |          | Planting                                                          |                                                                                                                                          |                                                                                                         |                                                                                                           |                                                                                                            |                                                   |                                                                                                          |                                                 |
|       |          | Weeding                                                           |                                                                                                                                          |                                                                                                         |                                                                                                           |                                                                                                            |                                                   |                                                                                                          |                                                 |
|       |          | Spraying                                                          |                                                                                                                                          |                                                                                                         |                                                                                                           |                                                                                                            |                                                   |                                                                                                          |                                                 |
|       |          | Harvesting                                                        |                                                                                                                                          |                                                                                                         |                                                                                                           |                                                                                                            |                                                   |                                                                                                          |                                                 |
|       |          | Land Preparation                                                  |                                                                                                                                          |                                                                                                         |                                                                                                           |                                                                                                            |                                                   |                                                                                                          |                                                 |
|       |          | Planting                                                          |                                                                                                                                          |                                                                                                         |                                                                                                           |                                                                                                            |                                                   |                                                                                                          |                                                 |
|       |          | Weeding                                                           |                                                                                                                                          |                                                                                                         |                                                                                                           |                                                                                                            |                                                   |                                                                                                          |                                                 |
|       |          | Spraying                                                          |                                                                                                                                          |                                                                                                         |                                                                                                           |                                                                                                            |                                                   |                                                                                                          |                                                 |
|       |          | Harvesting                                                        |                                                                                                                                          |                                                                                                         |                                                                                                           |                                                                                                            |                                                   |                                                                                                          |                                                 |
|       |          | Land Preparation                                                  |                                                                                                                                          |                                                                                                         |                                                                                                           |                                                                                                            |                                                   |                                                                                                          |                                                 |
|       |          | Planting                                                          |                                                                                                                                          |                                                                                                         |                                                                                                           |                                                                                                            |                                                   |                                                                                                          |                                                 |
|       |          | Weeding                                                           |                                                                                                                                          |                                                                                                         |                                                                                                           |                                                                                                            |                                                   |                                                                                                          |                                                 |
|       |          | Spraying                                                          |                                                                                                                                          |                                                                                                         |                                                                                                           |                                                                                                            |                                                   |                                                                                                          |                                                 |
|       |          | Harvesting                                                        |                                                                                                                                          |                                                                                                         |                                                                                                           |                                                                                                            |                                                   |                                                                                                          |                                                 |

Household ID

Male Respondent ID

Female Respondent ID

| SUB-PLOT | CROP | 7.27a                                                                                                                                                                                                                                                                                                                                                            |      |           | 7.28a                                                                                                                                                                                                                                                                                                                                                                                                            |      |           | 7.29a                                                                                                                                                                                  |      |
|----------|------|------------------------------------------------------------------------------------------------------------------------------------------------------------------------------------------------------------------------------------------------------------------------------------------------------------------------------------------------------------------|------|-----------|------------------------------------------------------------------------------------------------------------------------------------------------------------------------------------------------------------------------------------------------------------------------------------------------------------------------------------------------------------------------------------------------------------------|------|-----------|----------------------------------------------------------------------------------------------------------------------------------------------------------------------------------------|------|
|          |      | AMOUNT                                                                                                                                                                                                                                                                                                                                                           | UNIT | WEIGHT KG | AMOUNT                                                                                                                                                                                                                                                                                                                                                                                                           | UNIT | Weight Kg | PRICE                                                                                                                                                                                  | UNIT |
|          |      | 7.27a<br>How much was harvested in the second season of 2013?<br><br>UNITS OF MEASURE:<br>1-Basin<br>2-Kilogram<br>3-Stem / Racime (of bananas or plantains)<br>4-Sack / Bag<br>5-Tonnes<br>6-Tampeco<br>7-No harvest (in the year)→next line<br><br><b>[If they respond sack/bag or other measure not in kg, ask the weight of an average sack/bag in kgs.]</b> |      |           | 7.28a<br>How much did you sell in the second season of 2013?<br><br><b>[Verify that it's not greater than the amount harvested.]</b><br><br>UNITS OF MEASURE:<br>1-Basin<br>2-Kilogram<br>3- Stem / Bunch (of bananas)<br>4-Sack / Bag<br>5-Tonnes<br>6-Tampeco<br>7-Nothing sold → next line<br><br><b>[If they respond sack/bag or other measure not in kg, ask the weight of an average sack/bag in kgs.]</b> |      |           | 7.29a<br>What was the common sales price for the second season of 2013?<br><br>UNITS OF MEASUREMENT:<br>1-Basin<br>2-Kilogram<br>3-Stem/Racime<br>4-Sack/Bag<br>5-Tonnes<br>6- Tampeco |      |
|          |      |                                                                                                                                                                                                                                                                                                                                                                  |      |           |                                                                                                                                                                                                                                                                                                                                                                                                                  |      |           |                                                                                                                                                                                        |      |
|          |      |                                                                                                                                                                                                                                                                                                                                                                  |      |           |                                                                                                                                                                                                                                                                                                                                                                                                                  |      |           |                                                                                                                                                                                        |      |
|          |      |                                                                                                                                                                                                                                                                                                                                                                  |      |           |                                                                                                                                                                                                                                                                                                                                                                                                                  |      |           |                                                                                                                                                                                        |      |
|          |      |                                                                                                                                                                                                                                                                                                                                                                  |      |           |                                                                                                                                                                                                                                                                                                                                                                                                                  |      |           |                                                                                                                                                                                        |      |
|          |      |                                                                                                                                                                                                                                                                                                                                                                  |      |           |                                                                                                                                                                                                                                                                                                                                                                                                                  |      |           |                                                                                                                                                                                        |      |
|          |      |                                                                                                                                                                                                                                                                                                                                                                  |      |           |                                                                                                                                                                                                                                                                                                                                                                                                                  |      |           |                                                                                                                                                                                        |      |
|          |      |                                                                                                                                                                                                                                                                                                                                                                  |      |           |                                                                                                                                                                                                                                                                                                                                                                                                                  |      |           |                                                                                                                                                                                        |      |
|          |      |                                                                                                                                                                                                                                                                                                                                                                  |      |           |                                                                                                                                                                                                                                                                                                                                                                                                                  |      |           |                                                                                                                                                                                        |      |
|          |      |                                                                                                                                                                                                                                                                                                                                                                  |      |           |                                                                                                                                                                                                                                                                                                                                                                                                                  |      |           |                                                                                                                                                                                        |      |
|          |      |                                                                                                                                                                                                                                                                                                                                                                  |      |           |                                                                                                                                                                                                                                                                                                                                                                                                                  |      |           |                                                                                                                                                                                        |      |
|          |      |                                                                                                                                                                                                                                                                                                                                                                  |      |           |                                                                                                                                                                                                                                                                                                                                                                                                                  |      |           |                                                                                                                                                                                        |      |
|          |      |                                                                                                                                                                                                                                                                                                                                                                  |      |           |                                                                                                                                                                                                                                                                                                                                                                                                                  |      |           |                                                                                                                                                                                        |      |
|          |      |                                                                                                                                                                                                                                                                                                                                                                  |      |           |                                                                                                                                                                                                                                                                                                                                                                                                                  |      |           |                                                                                                                                                                                        |      |
|          |      |                                                                                                                                                                                                                                                                                                                                                                  |      |           |                                                                                                                                                                                                                                                                                                                                                                                                                  |      |           |                                                                                                                                                                                        |      |
|          |      |                                                                                                                                                                                                                                                                                                                                                                  |      |           |                                                                                                                                                                                                                                                                                                                                                                                                                  |      |           |                                                                                                                                                                                        |      |
|          |      |                                                                                                                                                                                                                                                                                                                                                                  |      |           |                                                                                                                                                                                                                                                                                                                                                                                                                  |      |           |                                                                                                                                                                                        |      |
|          |      |                                                                                                                                                                                                                                                                                                                                                                  |      |           |                                                                                                                                                                                                                                                                                                                                                                                                                  |      |           |                                                                                                                                                                                        |      |
|          |      |                                                                                                                                                                                                                                                                                                                                                                  |      |           |                                                                                                                                                                                                                                                                                                                                                                                                                  |      |           |                                                                                                                                                                                        |      |
|          |      |                                                                                                                                                                                                                                                                                                                                                                  |      |           |                                                                                                                                                                                                                                                                                                                                                                                                                  |      |           |                                                                                                                                                                                        |      |
|          |      |                                                                                                                                                                                                                                                                                                                                                                  |      |           |                                                                                                                                                                                                                                                                                                                                                                                                                  |      |           |                                                                                                                                                                                        |      |
|          |      |                                                                                                                                                                                                                                                                                                                                                                  |      |           |                                                                                                                                                                                                                                                                                                                                                                                                                  |      |           |                                                                                                                                                                                        |      |
|          |      |                                                                                                                                                                                                                                                                                                                                                                  |      |           |                                                                                                                                                                                                                                                                                                                                                                                                                  |      |           |                                                                                                                                                                                        |      |



Household ID Male Respondent ID Female Respondent ID 

| SUB-PLOT | CROP | 7.27b<br>How much was harvested in the first season of 2014?<br><br>UNITS OF MEASURE:<br>1-Basin<br>2-Kilogram<br>3-Stem / Racime (of bananas or plantains)<br>4-Sack / Bag<br>5-Tonnes<br>6-Tampeco<br>7-No harvest (in the year)→next line<br><br>[If they respond sack/bag or other measure not in kg, ask the weight of an average sack/bag in kgs.] |      |           | 7.28b<br>How much did you sell in the first season of 2014?<br><br>[Verify that it's not greater than the amount harvested.]<br><br>UNITS OF MEASURE:<br>1-Basin<br>2-Kilogram<br>3- Stem / Bunch (of bananas)<br>4-Sack / Bag<br>5-Tonnes<br>6-Tampeco<br>7-Nothing sold → next line<br><br>[If they respond sack/bag or other measure not in kg, ask the weight of an average sack/bag in kgs.] |      |           | 7.29b<br>What was the common sales price for first season of 2014?<br><br>UNITS OF MEASUREMENT:<br>1-Basin<br>2-Kilogram<br>3-Stem/Racime<br>4-Sack/Bag<br>5-Tonnes<br>6- Tampeco |      |
|----------|------|----------------------------------------------------------------------------------------------------------------------------------------------------------------------------------------------------------------------------------------------------------------------------------------------------------------------------------------------------------|------|-----------|---------------------------------------------------------------------------------------------------------------------------------------------------------------------------------------------------------------------------------------------------------------------------------------------------------------------------------------------------------------------------------------------------|------|-----------|-----------------------------------------------------------------------------------------------------------------------------------------------------------------------------------|------|
|          |      | AMOUNT                                                                                                                                                                                                                                                                                                                                                   | UNIT | WEIGHT KG | AMOUNT                                                                                                                                                                                                                                                                                                                                                                                            | UNIT | Weight Kg | PRICE                                                                                                                                                                             | UNIT |
|          |      |                                                                                                                                                                                                                                                                                                                                                          |      |           |                                                                                                                                                                                                                                                                                                                                                                                                   |      |           |                                                                                                                                                                                   |      |
|          |      |                                                                                                                                                                                                                                                                                                                                                          |      |           |                                                                                                                                                                                                                                                                                                                                                                                                   |      |           |                                                                                                                                                                                   |      |
|          |      |                                                                                                                                                                                                                                                                                                                                                          |      |           |                                                                                                                                                                                                                                                                                                                                                                                                   |      |           |                                                                                                                                                                                   |      |
|          |      |                                                                                                                                                                                                                                                                                                                                                          |      |           |                                                                                                                                                                                                                                                                                                                                                                                                   |      |           |                                                                                                                                                                                   |      |
|          |      |                                                                                                                                                                                                                                                                                                                                                          |      |           |                                                                                                                                                                                                                                                                                                                                                                                                   |      |           |                                                                                                                                                                                   |      |
|          |      |                                                                                                                                                                                                                                                                                                                                                          |      |           |                                                                                                                                                                                                                                                                                                                                                                                                   |      |           |                                                                                                                                                                                   |      |
|          |      |                                                                                                                                                                                                                                                                                                                                                          |      |           |                                                                                                                                                                                                                                                                                                                                                                                                   |      |           |                                                                                                                                                                                   |      |
|          |      |                                                                                                                                                                                                                                                                                                                                                          |      |           |                                                                                                                                                                                                                                                                                                                                                                                                   |      |           |                                                                                                                                                                                   |      |
|          |      |                                                                                                                                                                                                                                                                                                                                                          |      |           |                                                                                                                                                                                                                                                                                                                                                                                                   |      |           |                                                                                                                                                                                   |      |
|          |      |                                                                                                                                                                                                                                                                                                                                                          |      |           |                                                                                                                                                                                                                                                                                                                                                                                                   |      |           |                                                                                                                                                                                   |      |
|          |      |                                                                                                                                                                                                                                                                                                                                                          |      |           |                                                                                                                                                                                                                                                                                                                                                                                                   |      |           |                                                                                                                                                                                   |      |
|          |      |                                                                                                                                                                                                                                                                                                                                                          |      |           |                                                                                                                                                                                                                                                                                                                                                                                                   |      |           |                                                                                                                                                                                   |      |
|          |      |                                                                                                                                                                                                                                                                                                                                                          |      |           |                                                                                                                                                                                                                                                                                                                                                                                                   |      |           |                                                                                                                                                                                   |      |
|          |      |                                                                                                                                                                                                                                                                                                                                                          |      |           |                                                                                                                                                                                                                                                                                                                                                                                                   |      |           |                                                                                                                                                                                   |      |
|          |      |                                                                                                                                                                                                                                                                                                                                                          |      |           |                                                                                                                                                                                                                                                                                                                                                                                                   |      |           |                                                                                                                                                                                   |      |
|          |      |                                                                                                                                                                                                                                                                                                                                                          |      |           |                                                                                                                                                                                                                                                                                                                                                                                                   |      |           |                                                                                                                                                                                   |      |
|          |      |                                                                                                                                                                                                                                                                                                                                                          |      |           |                                                                                                                                                                                                                                                                                                                                                                                                   |      |           |                                                                                                                                                                                   |      |
|          |      |                                                                                                                                                                                                                                                                                                                                                          |      |           |                                                                                                                                                                                                                                                                                                                                                                                                   |      |           |                                                                                                                                                                                   |      |
|          |      |                                                                                                                                                                                                                                                                                                                                                          |      |           |                                                                                                                                                                                                                                                                                                                                                                                                   |      |           |                                                                                                                                                                                   |      |
|          |      |                                                                                                                                                                                                                                                                                                                                                          |      |           |                                                                                                                                                                                                                                                                                                                                                                                                   |      |           |                                                                                                                                                                                   |      |
|          |      |                                                                                                                                                                                                                                                                                                                                                          |      |           |                                                                                                                                                                                                                                                                                                                                                                                                   |      |           |                                                                                                                                                                                   |      |
|          |      |                                                                                                                                                                                                                                                                                                                                                          |      |           |                                                                                                                                                                                                                                                                                                                                                                                                   |      |           |                                                                                                                                                                                   |      |

Household ID

Male Respondent ID

Female Respondent ID

**THIS POINT, INTERVIEW THE COUPLE SEPARATELY.**

Household ID Male Respondent ID Female Respondent ID 

### 8. Decision Making (Ask each decision maker separately)

Fill in the sub-plots used in the last section and ask these decision-making questions about those sub-plots.

| Sub-Plots | 8.1.1<br>Who decides what crops to plant on this sub-plot? | 8.1.2<br>Who decides how to prepare the land for planting? | 8.1.3<br>Who decides if you will use fertilizers (including organic)?<br><br>If you do not use fertilizers, who decides not to use them? | 8.1.4<br>Who decides what inputs you use? | 8.1.5<br>Who decides to hire labor (or not hire labor)? | 8.1.6<br>Who decides how to control weeds (manual weeding, use of herbicides, etc.)? | 8.1.7<br>Who decides when to begin harvesting? | 8.1.8<br>Who decides how much of the harvest to sell? | 8.1.9<br>Who decides how to use the income from other sale of the crop? |
|-----------|------------------------------------------------------------|------------------------------------------------------------|------------------------------------------------------------------------------------------------------------------------------------------|-------------------------------------------|---------------------------------------------------------|--------------------------------------------------------------------------------------|------------------------------------------------|-------------------------------------------------------|-------------------------------------------------------------------------|
|           | IDs / CODE                                                 | IDs / CODE                                                 | IDs / CODE                                                                                                                               | IDs / CODE                                | IDs / CODE                                              | IDs / CODE                                                                           | IDs / CODE                                     | IDs / CODE                                            | IDs / CODE                                                              |
|           |                                                            |                                                            |                                                                                                                                          |                                           |                                                         |                                                                                      |                                                |                                                       |                                                                         |
|           |                                                            |                                                            |                                                                                                                                          |                                           |                                                         |                                                                                      |                                                |                                                       |                                                                         |
|           |                                                            |                                                            |                                                                                                                                          |                                           |                                                         |                                                                                      |                                                |                                                       |                                                                         |
|           |                                                            |                                                            |                                                                                                                                          |                                           |                                                         |                                                                                      |                                                |                                                       |                                                                         |
|           |                                                            |                                                            |                                                                                                                                          |                                           |                                                         |                                                                                      |                                                |                                                       |                                                                         |
|           |                                                            |                                                            |                                                                                                                                          |                                           |                                                         |                                                                                      |                                                |                                                       |                                                                         |
|           |                                                            |                                                            |                                                                                                                                          |                                           |                                                         |                                                                                      |                                                |                                                       |                                                                         |
|           |                                                            |                                                            |                                                                                                                                          |                                           |                                                         |                                                                                      |                                                |                                                       |                                                                         |
|           |                                                            |                                                            |                                                                                                                                          |                                           |                                                         |                                                                                      |                                                |                                                       |                                                                         |
|           |                                                            |                                                            |                                                                                                                                          |                                           |                                                         |                                                                                      |                                                |                                                       |                                                                         |
|           |                                                            |                                                            |                                                                                                                                          |                                           |                                                         |                                                                                      |                                                |                                                       |                                                                         |
|           |                                                            |                                                            |                                                                                                                                          |                                           |                                                         |                                                                                      |                                                |                                                       |                                                                         |
|           |                                                            |                                                            |                                                                                                                                          |                                           |                                                         |                                                                                      |                                                |                                                       |                                                                         |
|           |                                                            |                                                            |                                                                                                                                          |                                           |                                                         |                                                                                      |                                                |                                                       |                                                                         |
|           |                                                            |                                                            |                                                                                                                                          |                                           |                                                         |                                                                                      |                                                |                                                       |                                                                         |
|           |                                                            |                                                            |                                                                                                                                          |                                           |                                                         |                                                                                      |                                                |                                                       |                                                                         |
|           |                                                            |                                                            |                                                                                                                                          |                                           |                                                         |                                                                                      |                                                |                                                       |                                                                         |
|           |                                                            |                                                            |                                                                                                                                          |                                           |                                                         |                                                                                      |                                                |                                                       |                                                                         |

Household ID

Male Respondent ID

Female Respondent ID

**Module 8.2**

| 8.2.1<br>Currently how many [ANIMAL] does the household have?<br><br>[Write 0 if the household does not have any of this animal] | 8.2.2<br>Who in the household are the owners of the [ANIMAL]? | 8.2.3<br>Who is usually in charge of giving water to [ANIMAL] usually? | 8.2.4<br>Who decides what to feed the [ANIMAL] usually? | 8.2.5<br>Who is usually in charge of the [ANIMAL] health? | 8.2.6<br>Who decides where the [ANIMAL] will graze usually? | 8.2.7<br>Who decides about the reproduction of the [ANIMAL] usually? | 8.2.8<br>Who decides when to slaughter an [ANIMAL] usually? |
|----------------------------------------------------------------------------------------------------------------------------------|---------------------------------------------------------------|------------------------------------------------------------------------|---------------------------------------------------------|-----------------------------------------------------------|-------------------------------------------------------------|----------------------------------------------------------------------|-------------------------------------------------------------|
|                                                                                                                                  | IDs                                                           | IDs/COD                                                                | IDs/COD                                                 | IDs/COD                                                   | IDs/COD                                                     | IDs/COD                                                              | IDs/COD                                                     |
| Cattle                                                                                                                           |                                                               |                                                                        |                                                         |                                                           |                                                             |                                                                      |                                                             |
| Milk Cows                                                                                                                        |                                                               |                                                                        |                                                         |                                                           |                                                             |                                                                      |                                                             |
| Oxen                                                                                                                             |                                                               |                                                                        |                                                         |                                                           |                                                             |                                                                      |                                                             |
| Goats                                                                                                                            |                                                               |                                                                        |                                                         |                                                           |                                                             |                                                                      |                                                             |
| Sheep                                                                                                                            |                                                               |                                                                        |                                                         |                                                           |                                                             |                                                                      |                                                             |
| Rabbits/<br>Guinea pigs                                                                                                          |                                                               |                                                                        |                                                         |                                                           |                                                             |                                                                      |                                                             |
| Chicken                                                                                                                          |                                                               |                                                                        |                                                         |                                                           |                                                             |                                                                      |                                                             |
| Other Poultry                                                                                                                    |                                                               |                                                                        |                                                         |                                                           |                                                             |                                                                      |                                                             |
| Pigs                                                                                                                             |                                                               |                                                                        |                                                         |                                                           |                                                             |                                                                      |                                                             |
| Bees                                                                                                                             |                                                               |                                                                        |                                                         |                                                           |                                                             |                                                                      |                                                             |
| Fish                                                                                                                             |                                                               |                                                                        |                                                         |                                                           |                                                             |                                                                      |                                                             |
| Donkeys                                                                                                                          |                                                               |                                                                        |                                                         |                                                           |                                                             |                                                                      |                                                             |

Household ID

Male Respondent ID

Female Respondent ID

| <b>Currently how many [ANIMAL] does the household have?</b><br><br><b>[Write 0 if the household does not have any of this animal]</b> | 8.2.9                                                                        | 8.2.10                                                                                                               | 8.2.11                                                      | 8.2.12                                                                        | 8.2.13                                                                                        | 8.2.14                            | 8.2.15                                                                       |
|---------------------------------------------------------------------------------------------------------------------------------------|------------------------------------------------------------------------------|----------------------------------------------------------------------------------------------------------------------|-------------------------------------------------------------|-------------------------------------------------------------------------------|-----------------------------------------------------------------------------------------------|-----------------------------------|------------------------------------------------------------------------------|
|                                                                                                                                       | Who is in charge of [ANIMAL PRODUCT] usually? (e.g eggs, milk, meat, manure) | Did you sell any of the [ANIMAL PRO-DUCT] in the last 12 months?<br><br>1-Yes →Go to 8.2.11<br><br>2-No→Go to 8.2.13 | Who normally decides how much to sell of [ANIMAL PRO-DUCT]? | Who normally decides how to use the income from the sale of [ANIMAL PRODUCT]? | Did you sell [ANIMAL] in the last 12 months?<br><br>1-Yes<br><br>2-No→Skip to the next animal | Who decided to sell the [ANIMAL]? | Who decided how to use the income obtained through the sale of the [ANIMAL]? |
|                                                                                                                                       | IDs/COD                                                                      | CATEGORY                                                                                                             | IDs/COD                                                     | IDs/COD                                                                       | CATEGORY                                                                                      | IDs/COD                           | IDs/COD                                                                      |
| Cattle                                                                                                                                |                                                                              |                                                                                                                      |                                                             |                                                                               |                                                                                               |                                   |                                                                              |
| Milk Cows                                                                                                                             |                                                                              |                                                                                                                      |                                                             |                                                                               |                                                                                               |                                   |                                                                              |
| Oxen                                                                                                                                  |                                                                              |                                                                                                                      |                                                             |                                                                               |                                                                                               |                                   |                                                                              |
| Goats                                                                                                                                 |                                                                              |                                                                                                                      |                                                             |                                                                               |                                                                                               |                                   |                                                                              |
| Sheep                                                                                                                                 |                                                                              |                                                                                                                      |                                                             |                                                                               |                                                                                               |                                   |                                                                              |
| Rabbits/Guinea pigs                                                                                                                   |                                                                              |                                                                                                                      |                                                             |                                                                               |                                                                                               |                                   |                                                                              |
| Chicken                                                                                                                               |                                                                              |                                                                                                                      |                                                             |                                                                               |                                                                                               |                                   |                                                                              |
| Other Poultry                                                                                                                         |                                                                              |                                                                                                                      |                                                             |                                                                               |                                                                                               |                                   |                                                                              |
| Pigs                                                                                                                                  |                                                                              |                                                                                                                      |                                                             |                                                                               |                                                                                               |                                   |                                                                              |
| Bees                                                                                                                                  |                                                                              |                                                                                                                      |                                                             |                                                                               |                                                                                               |                                   |                                                                              |
| Fish                                                                                                                                  |                                                                              |                                                                                                                      |                                                             |                                                                               |                                                                                               |                                   |                                                                              |
| Donkeys                                                                                                                               |                                                                              |                                                                                                                      |                                                             |                                                                               |                                                                                               |                                   |                                                                              |

Household ID Male Respondent ID Female Respondent ID **Module 8.3**

| Activity |                                                                                 | 8.3.1                                                                            |             | 8.3.2                 |  |  |  |
|----------|---------------------------------------------------------------------------------|----------------------------------------------------------------------------------|-------------|-----------------------|--|--|--|
|          |                                                                                 | In your household in the last five years have you [ACTIVITY]?                    |             | Who decided to do it? |  |  |  |
|          |                                                                                 | 1-Yes → Please describe and continue to 8.25<br>2-No → Skip to the next activity |             |                       |  |  |  |
|          |                                                                                 | CATEGORY                                                                         | DESCRIPTION | IDs / CODE            |  |  |  |
| <b>A</b> | Made important agricultural investments (machinery, infrastructure, irrigation) |                                                                                  |             |                       |  |  |  |
| <b>B</b> | Bought or sold land                                                             |                                                                                  |             |                       |  |  |  |
| <b>C</b> | Rented land                                                                     |                                                                                  |             |                       |  |  |  |
| <b>D</b> | Purchased major household items (appliances, furniture, etc.)                   |                                                                                  |             |                       |  |  |  |

| Expenses |                                                                 | 8.3.3                                        |  |  |  |
|----------|-----------------------------------------------------------------|----------------------------------------------|--|--|--|
|          |                                                                 | Who decides about the Budget for [expenses]? |  |  |  |
|          |                                                                 | IDs / CODE                                   |  |  |  |
| <b>E</b> | Food costs for the household                                    |                                              |  |  |  |
| <b>F</b> | Expenses for the children (clothing, school supplies, uniforms) |                                              |  |  |  |

Household ID

Male Respondent ID

Female Respondent ID

|                                                                                                                                                                                                                                                                                                                                               |                                                                                                                                                                   |                                                                                                                                                                                                                                                                                                                                                                                                                                    |                                                                                                                                      |                                                                                                                                                                                                                           |                                                                                                                                                                  |                                                                |                    |                                 |
|-----------------------------------------------------------------------------------------------------------------------------------------------------------------------------------------------------------------------------------------------------------------------------------------------------------------------------------------------|-------------------------------------------------------------------------------------------------------------------------------------------------------------------|------------------------------------------------------------------------------------------------------------------------------------------------------------------------------------------------------------------------------------------------------------------------------------------------------------------------------------------------------------------------------------------------------------------------------------|--------------------------------------------------------------------------------------------------------------------------------------|---------------------------------------------------------------------------------------------------------------------------------------------------------------------------------------------------------------------------|------------------------------------------------------------------------------------------------------------------------------------------------------------------|----------------------------------------------------------------|--------------------|---------------------------------|
| <p>8.3.4</p> <p>In the last one year have you worked off-farm?</p> <p><b>[It is not necessary to ask directly, you can verify from the labor module (module 2)]</b></p> <p>1-Yes, in agricultural activities<br/>2-Yes, in nonagricultural activities<br/>3-Yes, in both agricultural nonagricultural activities<br/>4-No → Skip to 8.3.7</p> | <p>8.3.5</p> <p>Did you make these decisions...?</p> <p>1- By yourself<br/>2- Together with<br/>3- With permission from<br/>4- Other person took the decision</p> | <p>8.3.6</p> <p>About the income that you received, how did you decide to spend it?</p> <p>1- I decide myself about what I earn<br/>2- I decide by myself about a part of it, but for another part I discuss with <b>(WRITE ID OF OTHER PERSON)</b><br/>3- I decide what to do with what I earn, jointly with: <b>(WRITE ID OF OTHER PERSON)</b><br/>4- I do not decide, another person does <b>(WRITE ID OF OTHER PERSON)</b></p> | <p>8.3.7</p> <p>Has anyone in your household received remittances in the last year?</p> <p>1- Yes, who?<br/>2- No-Skip to 8.3.11</p> | <p>8.3.8</p> <p>How often do you receive this remittance?</p> <p>1- Daily<br/>2- Every 2 weeks<br/>3- Monthly<br/>4- Every 2 months<br/>5- Every 3 months<br/>6- Every 6 months<br/>7- Annually<br/>8- Other, specify</p> | <p>8.3.9</p> <p>How much do remittances contribute to household income?</p> <p>1-Very little<br/>2-Little<br/>3-Half<br/>4-More than half<br/>5-The majority</p> | <p>8.3.10</p> <p>Whom do you receive this remittance from?</p> |                    |                                 |
| <p><b>CODE</b></p>                                                                                                                                                                                                                                                                                                                            | <p><b>CODE</b></p>                                                                                                                                                | <p><b>CODE</b></p>                                                                                                                                                                                                                                                                                                                                                                                                                 | <p><b>ID</b></p>                                                                                                                     | <p><b>CODE</b></p>                                                                                                                                                                                                        | <p><b>ID</b></p>                                                                                                                                                 | <p><b>CODE</b></p>                                             | <p><b>CODE</b></p> | <p><b>WRITE IN RESPONSE</b></p> |
|                                                                                                                                                                                                                                                                                                                                               |                                                                                                                                                                   |                                                                                                                                                                                                                                                                                                                                                                                                                                    |                                                                                                                                      |                                                                                                                                                                                                                           |                                                                                                                                                                  |                                                                |                    |                                 |

|                                                                                                                                                                                                       |                                                                                                      |                                                                                                                                                                                                                                                                                                                                  |                                                                                                                                                                                                                                                                                          |
|-------------------------------------------------------------------------------------------------------------------------------------------------------------------------------------------------------|------------------------------------------------------------------------------------------------------|----------------------------------------------------------------------------------------------------------------------------------------------------------------------------------------------------------------------------------------------------------------------------------------------------------------------------------|------------------------------------------------------------------------------------------------------------------------------------------------------------------------------------------------------------------------------------------------------------------------------------------|
| <p>8.3.11</p> <p>Who in the household earns the most money from off-farm activities?</p> <p><b>(Write the ID code of one person unless 2 or more people earn equally in off-farm activities.)</b></p> | <p>8.3.12</p> <p>From these off-farm activities, who contributes the most to household expenses?</p> | <p>8.3.13</p> <p>Keeping in mind all of the sources of income, including from your farm and off-farm activities, which is the <b>most</b> important for the maintenance/subsistence of the household?</p> <p>1-Agriculture (from the farm)<br/>2-Off-farm work (day labor/contract work)<br/>3-Business<br/>4-Other, specify</p> | <p>8.3.14</p> <p>Of all the foods that are consumed in the household, what proportion is purchased?</p> <p><b>(For pre-testing see which works best “purchased” or “produced on the farm”.)</b></p> <p>1-Very little<br/>2-Little<br/>3-Half<br/>4-More than half<br/>5-The majority</p> |
| <p><b>IDs</b></p>                                                                                                                                                                                     | <p><b>IDs</b></p>                                                                                    | <p><b>Category</b></p>                                                                                                                                                                                                                                                                                                           | <p><b>Category</b></p>                                                                                                                                                                                                                                                                   |
|                                                                                                                                                                                                       |                                                                                                      |                                                                                                                                                                                                                                                                                                                                  |                                                                                                                                                                                                                                                                                          |

Household ID Male Respondent ID Female Respondent ID 

## 9. Group Memberships *(Ask each decision-maker separately)*

|                             |                                                                        | 9.1                                                                                | 9.2                                                                         | 9.3                                                                | 9.4                                                                                                                                     | 9.5                                                                                                                                                                                   | 9.6                                                                                                                                                                       |
|-----------------------------|------------------------------------------------------------------------|------------------------------------------------------------------------------------|-----------------------------------------------------------------------------|--------------------------------------------------------------------|-----------------------------------------------------------------------------------------------------------------------------------------|---------------------------------------------------------------------------------------------------------------------------------------------------------------------------------------|---------------------------------------------------------------------------------------------------------------------------------------------------------------------------|
| <b>Categories of Groups</b> |                                                                        | Is there a [GROUP] in your community<br><br>1-Yes<br>2-No-->skip to the next group | Are you a member of this group?<br><br>1-Yes<br>2-No --> skip to next group | Do you usually attend meetings of this group?<br><br>1-Yes<br>2-No | Are you, or have you been in the last 5 years, elected to a leadership position in this group?<br><br>1-Yes<br>2-No→ Skip to next group | Do you feel comfortable speaking up in this group to give your opinion or offer suggestions?<br><br>1- No, absolutely not<br>2- Yes, with difficulty<br>3- Yes, I am very comfortable | How much influence do you have in making decisions in this [GROUP]?<br><br>1 –No influence<br>2 –Influence in some decisions<br>3 –Influence in the majority of decisions |
|                             |                                                                        |                                                                                    | <b>Category</b>                                                             | <b>Category</b>                                                    | <b>Category</b>                                                                                                                         | <b>Category</b>                                                                                                                                                                       | <b>Category</b>                                                                                                                                                           |
| <b>A</b>                    | Agricultural Producers Group (including Marketing Groups)              |                                                                                    |                                                                             |                                                                    |                                                                                                                                         |                                                                                                                                                                                       |                                                                                                                                                                           |
| <b>B</b>                    | Livestock Producer Groups (Including marketing Groups)                 |                                                                                    |                                                                             |                                                                    |                                                                                                                                         |                                                                                                                                                                                       |                                                                                                                                                                           |
| <b>C</b>                    | Fishery Producers Groups (Including marketing Groups)                  |                                                                                    |                                                                             |                                                                    |                                                                                                                                         |                                                                                                                                                                                       |                                                                                                                                                                           |
| <b>D</b>                    | Water User Groups                                                      |                                                                                    |                                                                             |                                                                    |                                                                                                                                         |                                                                                                                                                                                       |                                                                                                                                                                           |
| <b>E</b>                    | Watershed Management Groups                                            |                                                                                    |                                                                             |                                                                    |                                                                                                                                         |                                                                                                                                                                                       |                                                                                                                                                                           |
| <b>F</b>                    | Forest User Groups                                                     |                                                                                    |                                                                             |                                                                    |                                                                                                                                         |                                                                                                                                                                                       |                                                                                                                                                                           |
| <b>G</b>                    | Tree Nursery Groups/Reforestation Groups                               |                                                                                    |                                                                             |                                                                    |                                                                                                                                         |                                                                                                                                                                                       |                                                                                                                                                                           |
| <b>H</b>                    | Credit, Microfinance, or Savings Groups                                |                                                                                    |                                                                             |                                                                    |                                                                                                                                         |                                                                                                                                                                                       |                                                                                                                                                                           |
| <b>I</b>                    | Funeral/Burial or Insurance Group                                      |                                                                                    |                                                                             |                                                                    |                                                                                                                                         |                                                                                                                                                                                       |                                                                                                                                                                           |
| <b>J</b>                    | Income and marketing groups (nonagricultural)                          |                                                                                    |                                                                             |                                                                    |                                                                                                                                         |                                                                                                                                                                                       |                                                                                                                                                                           |
| <b>K</b>                    | Civic or charitable groups (improving the community or helping others) |                                                                                    |                                                                             |                                                                    |                                                                                                                                         |                                                                                                                                                                                       |                                                                                                                                                                           |
| <b>L</b>                    | Local Committees (neighborhood/village)                                |                                                                                    |                                                                             |                                                                    |                                                                                                                                         |                                                                                                                                                                                       |                                                                                                                                                                           |
| <b>M</b>                    | Religious Groups                                                       |                                                                                    |                                                                             |                                                                    |                                                                                                                                         |                                                                                                                                                                                       |                                                                                                                                                                           |
| <b>N</b>                    | Youth Group                                                            |                                                                                    |                                                                             |                                                                    |                                                                                                                                         |                                                                                                                                                                                       |                                                                                                                                                                           |
| <b>O</b>                    | Other; specify                                                         |                                                                                    |                                                                             |                                                                    |                                                                                                                                         |                                                                                                                                                                                       |                                                                                                                                                                           |



Household ID Male Respondent ID Female Respondent ID 

## 10. Practices (Ask each decision-maker separately)

Please remind the respondents that these answers should be from their point of view (whether the person knows and does the practice—not the household).

|                                                       | 10.1                                                                                                            | 10.2                                                                         | 10.3                                                                                                                             | 10.4                                                                                        | 10.5                                     | 10.6                                                                    | 10.7                                                                                                       | 10.8                                                            |
|-------------------------------------------------------|-----------------------------------------------------------------------------------------------------------------|------------------------------------------------------------------------------|----------------------------------------------------------------------------------------------------------------------------------|---------------------------------------------------------------------------------------------|------------------------------------------|-------------------------------------------------------------------------|------------------------------------------------------------------------------------------------------------|-----------------------------------------------------------------|
| <b>Practice</b>                                       | Do you know about or have you heard about PRACTICE]?)<br><br>1-Yes→ Continue to 10.2<br><br>2-No→ Next practice | What is your primary / principal source of information regarding [PRACTICE]? | In the last 12 months, have you used [PRÁCTICE] on any of your plots?<br><br>1-Yes → Continue to 10.4<br><br>2-No → Skip to 10.7 | On which sub-plots did you use this practice?<br><br>Indicate as: 1.1 (plot 1, sub-plot 1). | When did you begin to use this practice? | Who decided to start using this practice?<br><br>Skip to Next practice. | Did you use this [PRÁCTICE] previously on your plots?<br><br>1-Yes → Go to 10.8<br><br>2-No→ next practice | Why did you stop using this [PRÁCTICE]?<br><br>7> Next practice |
|                                                       | <b>CATEGORY</b>                                                                                                 |                                                                              | <b>CATEGORY</b>                                                                                                                  | <b>Sub-plots</b>                                                                            | <b>Year</b>                              | <b>IDs/CÓDE</b>                                                         |                                                                                                            |                                                                 |
| Agroforestry                                          |                                                                                                                 |                                                                              |                                                                                                                                  |                                                                                             |                                          |                                                                         |                                                                                                            |                                                                 |
| Live fences or wind breaks –                          |                                                                                                                 |                                                                              |                                                                                                                                  |                                                                                             |                                          |                                                                         |                                                                                                            |                                                                 |
| Terracing                                             |                                                                                                                 |                                                                              |                                                                                                                                  |                                                                                             |                                          |                                                                         |                                                                                                            |                                                                 |
| Drainage Ditches/channels                             |                                                                                                                 |                                                                              |                                                                                                                                  |                                                                                             |                                          |                                                                         |                                                                                                            |                                                                 |
| Minimum Tillage                                       |                                                                                                                 |                                                                              |                                                                                                                                  |                                                                                             |                                          |                                                                         |                                                                                                            |                                                                 |
| Farmyard manure compositing for application on crop   |                                                                                                                 |                                                                              |                                                                                                                                  |                                                                                             |                                          |                                                                         |                                                                                                            |                                                                 |
| Compost / Vermiculture                                |                                                                                                                 |                                                                              |                                                                                                                                  |                                                                                             |                                          |                                                                         |                                                                                                            |                                                                 |
| Mulching                                              |                                                                                                                 |                                                                              |                                                                                                                                  |                                                                                             |                                          |                                                                         |                                                                                                            |                                                                 |
| Appropriate use of fertilizers according to soil test |                                                                                                                 |                                                                              |                                                                                                                                  |                                                                                             |                                          |                                                                         |                                                                                                            |                                                                 |
| Cover Cropping                                        |                                                                                                                 |                                                                              |                                                                                                                                  |                                                                                             |                                          |                                                                         |                                                                                                            |                                                                 |
| Green Manure                                          |                                                                                                                 |                                                                              |                                                                                                                                  |                                                                                             |                                          |                                                                         |                                                                                                            |                                                                 |
| Intercropping                                         |                                                                                                                 |                                                                              |                                                                                                                                  |                                                                                             |                                          |                                                                         |                                                                                                            |                                                                 |
| Use of Improved Varieties                             |                                                                                                                 |                                                                              |                                                                                                                                  |                                                                                             |                                          |                                                                         |                                                                                                            |                                                                 |
| Integrated Pest Management                            |                                                                                                                 |                                                                              |                                                                                                                                  |                                                                                             |                                          |                                                                         |                                                                                                            |                                                                 |
| Zero grazing                                          |                                                                                                                 |                                                                              |                                                                                                                                  |                                                                                             |                                          |                                                                         |                                                                                                            |                                                                 |
| No Burning                                            |                                                                                                                 |                                                                              |                                                                                                                                  |                                                                                             |                                          |                                                                         |                                                                                                            |                                                                 |
| Fallow                                                |                                                                                                                 |                                                                              |                                                                                                                                  |                                                                                             |                                          |                                                                         |                                                                                                            |                                                                 |
| Stone lining                                          |                                                                                                                 |                                                                              |                                                                                                                                  |                                                                                             |                                          |                                                                         |                                                                                                            |                                                                 |
| Contour ploughing                                     |                                                                                                                 |                                                                              |                                                                                                                                  |                                                                                             |                                          |                                                                         |                                                                                                            |                                                                 |

Household ID Male Respondent ID Female Respondent ID *(Continuation of practices table.)*

| Practice                                                           | 10.11                                                                                                             | 10.12                                                                        | 10.13                                                                                                                              | 10.14                                         | 10.15                                    | 10.16                                     | 10.17                                                                                                         | 10.18                                                          |
|--------------------------------------------------------------------|-------------------------------------------------------------------------------------------------------------------|------------------------------------------------------------------------------|------------------------------------------------------------------------------------------------------------------------------------|-----------------------------------------------|------------------------------------------|-------------------------------------------|---------------------------------------------------------------------------------------------------------------|----------------------------------------------------------------|
|                                                                    | Do you know about or have you heard about [PRACTICE]?)<br><br>1-Yes→ Continue to 10.12<br><br>2-No→ Next practice | What is your primary / principal source of information regarding [PRACTICE]? | In the last 12 months, have you used [PRACTICE] on any of your plots?<br><br>1-Yes → Continue to 10.14<br><br>2-No → Skip to 10.17 | On which sub-plots did you use this practice? | When did you begin to use this practice? | Who decided to start using this practice? | Did you use this [PRACTICE] previously on your plots?<br><br>1-Yes → Skip to 10.18<br><br>2-No→ next practice | Why did you stop using this [PRACTICE]?<br><br>> Next practice |
|                                                                    | <b>CATEGORY</b>                                                                                                   | <b>CODE</b>                                                                  | <b>CATEGORY</b>                                                                                                                    | <b>Sub-plots</b>                              | <b>Year</b>                              | <b>IDs/CÓDE</b>                           |                                                                                                               |                                                                |
| Improved livestock breeds                                          |                                                                                                                   |                                                                              |                                                                                                                                    |                                               |                                          |                                           |                                                                                                               |                                                                |
| Improved Pasture                                                   |                                                                                                                   |                                                                              |                                                                                                                                    |                                               |                                          |                                           |                                                                                                               |                                                                |
| Pasture Rotation                                                   |                                                                                                                   |                                                                              |                                                                                                                                    |                                               |                                          |                                           |                                                                                                               |                                                                |
| Irrigation                                                         |                                                                                                                   |                                                                              |                                                                                                                                    |                                               |                                          |                                           |                                                                                                               |                                                                |
| Water storage for irrigation                                       |                                                                                                                   |                                                                              |                                                                                                                                    |                                               |                                          |                                           |                                                                                                               |                                                                |
| Improved processing of grains                                      |                                                                                                                   |                                                                              |                                                                                                                                    |                                               |                                          |                                           |                                                                                                               |                                                                |
| Use of fuel-efficient or improved stoves                           |                                                                                                                   |                                                                              |                                                                                                                                    |                                               |                                          |                                           |                                                                                                               |                                                                |
| Seed selection or seed preservation for planting in future seasons |                                                                                                                   |                                                                              |                                                                                                                                    |                                               |                                          |                                           |                                                                                                               |                                                                |
| Other, specify                                                     |                                                                                                                   |                                                                              |                                                                                                                                    |                                               |                                          |                                           |                                                                                                               |                                                                |

Household ID Male Respondent ID Female Respondent ID 

## 11. Sources and types of information *(Ask each decision-maker separately.)*

|                                                                   |                                                                                                                         |
|-------------------------------------------------------------------|-------------------------------------------------------------------------------------------------------------------------|
| <b>Source</b>                                                     | 11.1<br>Did you receive agricultural or climatic information from this [SOURCE]?<br><br>1 - Yes<br>2 - No → next source |
|                                                                   | <b>CATEGORY</b>                                                                                                         |
| Government Extension Workers                                      |                                                                                                                         |
| Farmer or Community Organizations                                 |                                                                                                                         |
| NGOs                                                              |                                                                                                                         |
| Agriculture Service Providers (Selling Seeds, fertilizers, etc)   |                                                                                                                         |
| Agriculture Fairs                                                 |                                                                                                                         |
| Demonstration/Field Days                                          |                                                                                                                         |
| Family Members                                                    |                                                                                                                         |
| Neighbors                                                         |                                                                                                                         |
| Radio                                                             |                                                                                                                         |
| TV                                                                |                                                                                                                         |
| Newspapers/Magazines                                              |                                                                                                                         |
| Text Messages                                                     |                                                                                                                         |
| Internet (through computer/cellphone)                             |                                                                                                                         |
| Nature (natural indicators, own knowledge, traditional knowledge) |                                                                                                                         |
| Other, specify                                                    |                                                                                                                         |

Household ID Male Respondent ID Female Respondent ID 

| Types of Information                                         | 11.2            | 11.3                                                                                                                    | 11.4                                     |
|--------------------------------------------------------------|-----------------|-------------------------------------------------------------------------------------------------------------------------|------------------------------------------|
|                                                              |                 | Have you received this [TYPE] of information?<br><br>1-Yes→Continue to 11.3<br><br>2-No→ Go to next type of information | What was the source of this information? |
|                                                              | <b>CATEGORY</b> | <b>SOURCE</b>                                                                                                           | <b>CATEGORY</b>                          |
| Short term rain Forecast (daily, weekly, monthly)            |                 |                                                                                                                         |                                          |
| Medium and Long Term Rain Forecast (drought, 2-3 months)     |                 |                                                                                                                         |                                          |
| Information about crop production and management             |                 |                                                                                                                         |                                          |
| Post-harvest management                                      |                 |                                                                                                                         |                                          |
| Information about the production and management of livestock |                 |                                                                                                                         |                                          |

Household ID Male Respondent ID Female Respondent ID 

## 12. Climatic shocks *(Ask each decision-maker separately)*

| 12.1                                                                                                                                                                                                                                                                                                                                           | 12.2                                                                           | 12.3                                                                                                                                                                                | 12.4                                                                                             | 12.5                                                                                                                  | 12.6                            | 12.7                                                                                                                                                                                                                                                                              | 12.8                      | 12.9                                  |
|------------------------------------------------------------------------------------------------------------------------------------------------------------------------------------------------------------------------------------------------------------------------------------------------------------------------------------------------|--------------------------------------------------------------------------------|-------------------------------------------------------------------------------------------------------------------------------------------------------------------------------------|--------------------------------------------------------------------------------------------------|-----------------------------------------------------------------------------------------------------------------------|---------------------------------|-----------------------------------------------------------------------------------------------------------------------------------------------------------------------------------------------------------------------------------------------------------------------------------|---------------------------|---------------------------------------|
| What natural climate shocks have affected your household (income or agriculture) during the last five years?<br><br>0- None → Go to section 13<br>1- Floods<br>2- droughts<br>3- storms/ strong winds<br>4- irregular rain<br>5- Frost/Cold Temperatures<br>6- Heat Waves<br>7- Fires<br>8- Land Slides<br>9-Earthquakes<br>10- Other, specify | When was the last climatic shock?<br><br><b>[Year, in the last five years]</b> | The shock impacted:<br><br>1- Only my household<br>2- Some households in the community<br>3- The majority of the households in the community<br>4-Many households in the community. | What were the primary damages of the shock (to the household)?<br><br>(Name up to three damages) | What immediate actions did members of your household take to cope with the damages?<br><br>(Name up to three actions) | Who decided to take the action? | <b>[Verify if the household sold assets, borrowed money or used savings for this shock]</b><br><br><b>If they do not mention this in action 12.5, please ask.</b><br><br>1-Yes, sold assets→ go to 12.8<br><br>2-Yes, used savings or borrowed→ go to 12.9<br><br>3-No→next event | What assets did you sell? | Who was the owner/solicitor/borrower? |
| CODE                                                                                                                                                                                                                                                                                                                                           | YEAR                                                                           | CATEGORY                                                                                                                                                                            | DAMAGES                                                                                          | ACTIONS                                                                                                               | IDs/CODES                       | CATEGORY                                                                                                                                                                                                                                                                          |                           | IDs/CODES                             |
| SHOCK 1                                                                                                                                                                                                                                                                                                                                        |                                                                                |                                                                                                                                                                                     |                                                                                                  |                                                                                                                       |                                 |                                                                                                                                                                                                                                                                                   |                           |                                       |
|                                                                                                                                                                                                                                                                                                                                                |                                                                                |                                                                                                                                                                                     |                                                                                                  |                                                                                                                       |                                 |                                                                                                                                                                                                                                                                                   |                           |                                       |
|                                                                                                                                                                                                                                                                                                                                                |                                                                                |                                                                                                                                                                                     |                                                                                                  |                                                                                                                       |                                 |                                                                                                                                                                                                                                                                                   |                           |                                       |
| SHOCK 2                                                                                                                                                                                                                                                                                                                                        |                                                                                |                                                                                                                                                                                     |                                                                                                  |                                                                                                                       |                                 |                                                                                                                                                                                                                                                                                   |                           |                                       |
|                                                                                                                                                                                                                                                                                                                                                |                                                                                |                                                                                                                                                                                     |                                                                                                  |                                                                                                                       |                                 |                                                                                                                                                                                                                                                                                   |                           |                                       |
|                                                                                                                                                                                                                                                                                                                                                |                                                                                |                                                                                                                                                                                     |                                                                                                  |                                                                                                                       |                                 |                                                                                                                                                                                                                                                                                   |                           |                                       |
| SHOCK 3                                                                                                                                                                                                                                                                                                                                        |                                                                                |                                                                                                                                                                                     |                                                                                                  |                                                                                                                       |                                 |                                                                                                                                                                                                                                                                                   |                           |                                       |
|                                                                                                                                                                                                                                                                                                                                                |                                                                                |                                                                                                                                                                                     |                                                                                                  |                                                                                                                       |                                 |                                                                                                                                                                                                                                                                                   |                           |                                       |
|                                                                                                                                                                                                                                                                                                                                                |                                                                                |                                                                                                                                                                                     |                                                                                                  |                                                                                                                       |                                 |                                                                                                                                                                                                                                                                                   |                           |                                       |
| SHOCK 4                                                                                                                                                                                                                                                                                                                                        |                                                                                |                                                                                                                                                                                     |                                                                                                  |                                                                                                                       |                                 |                                                                                                                                                                                                                                                                                   |                           |                                       |
|                                                                                                                                                                                                                                                                                                                                                |                                                                                |                                                                                                                                                                                     |                                                                                                  |                                                                                                                       |                                 |                                                                                                                                                                                                                                                                                   |                           |                                       |
|                                                                                                                                                                                                                                                                                                                                                |                                                                                |                                                                                                                                                                                     |                                                                                                  |                                                                                                                       |                                 |                                                                                                                                                                                                                                                                                   |                           |                                       |

Household ID

Male Respondent ID

Female Respondent ID

### 13. Perceptions of climate change and associated risks *(Ask each decision-maker separately.)*

13.1 Comparing the climate and/or weather in your youth and that of today, have you noticed any changes in the climate?

- 1-Yes → Continue to 13.2
- 2-No → Skip to 13.3A (next column)

|          |                      |
|----------|----------------------|
| CATEGORY | <input type="text"/> |
|----------|----------------------|

13.2 What changes have you noticed?

13.3 How likely do you think it is that there will be climate changes in the futures?

- 1-Exteremly unlikely → Skip to Section 14
- 2-Somewhat likely
- 3-Likely
- 4-Very likely

|          |                      |
|----------|----------------------|
| CATEGORY | <input type="text"/> |
|----------|----------------------|

13. 4 How much of an impact do you think that these changes will have on your household's livelihood?

- 1-No impact
- 2-Small impact
- 3-Medium impact
- 4-Strong Impact

|          |                      |
|----------|----------------------|
| CATEGORY | <input type="text"/> |
|----------|----------------------|

13.5 What are you most worried about in regards to climate (or weather)?

Go to Section 14.

13.3A How likely do you think it is that there will be climate changes in the futures?

- 1-Exteremly unlikely → Go to Section 14
- 2-Somewhat likely
- 3-Likely
- 4-Very likely

|          |                      |
|----------|----------------------|
| CATEGORY | <input type="text"/> |
|----------|----------------------|

13. 4A How much of an impact do you think that these changes will have on your household's livelihood?

- 1-No impact
- 2-Small impact
- 3-Medium impact
- 4-Strong Impact

|          |                      |
|----------|----------------------|
| CATEGORY | <input type="text"/> |
|----------|----------------------|

13.5A What are you most worried about in regards to climate (or weather)?

Go to Section 14.

Household ID Male Respondent ID Female Respondent ID **14. Adaptation (Ask each decision-maker separately.)**

| 14.1                                                                                                                                                                                                                                                   | 14.2                                                                        | 14.3                                                       | 14.4                                                                                                                                                                                                       | 14.5                                             | 14.6                                                                                                                                                                            | 14.7                                        | 14.8                                                                                |
|--------------------------------------------------------------------------------------------------------------------------------------------------------------------------------------------------------------------------------------------------------|-----------------------------------------------------------------------------|------------------------------------------------------------|------------------------------------------------------------------------------------------------------------------------------------------------------------------------------------------------------------|--------------------------------------------------|---------------------------------------------------------------------------------------------------------------------------------------------------------------------------------|---------------------------------------------|-------------------------------------------------------------------------------------|
| <p>Have you made any changes to protect yourself, your family, or your community (from climate changes)?</p> <p>This can include any changes in agriculture, livestock, or livelihood strategies.</p> <p>1-Yes→ skip to 14.2<br/>2-No → section 15</p> | <p>What changes have you made?</p> <p>Name the most important (up to 5)</p> | <p>Who in the household decided to make these changes?</p> | <p>Do you plan to make any (additional) changes to protect against changes in climate over the next 5 years?</p> <p>1- Yes&gt;&gt;14.5<br/>2- No &gt;&gt; 14.6<br/>3- Don't know/ not sure&gt;&gt;14.6</p> | <p>If yes, what changes do you plan to make?</p> | <p>Are there any changes you would like to make but are not able to in the near future?</p> <p>1-Yes→ Go to 14.7<br/>2-No→Section 15<br/>3-Don't Know/Not Sure → section 15</p> | <p>What changes would you like to make?</p> | <p>Why is it not possible to make these changes?</p> <p>&gt; Skip to section 15</p> |
| CODE                                                                                                                                                                                                                                                   | IDs / CODE                                                                  |                                                            |                                                                                                                                                                                                            | CATEGORY                                         | CATEGORY                                                                                                                                                                        |                                             |                                                                                     |
|                                                                                                                                                                                                                                                        | Change 1:                                                                   |                                                            |                                                                                                                                                                                                            |                                                  | Change 1:                                                                                                                                                                       | Change 1:                                   |                                                                                     |
|                                                                                                                                                                                                                                                        | Change 2:                                                                   |                                                            |                                                                                                                                                                                                            |                                                  | Change 2:                                                                                                                                                                       | Change 2:                                   |                                                                                     |
|                                                                                                                                                                                                                                                        | Change 3:                                                                   |                                                            |                                                                                                                                                                                                            |                                                  | Change 3:                                                                                                                                                                       | Change 3:                                   |                                                                                     |
|                                                                                                                                                                                                                                                        | Change 4:                                                                   |                                                            |                                                                                                                                                                                                            |                                                  | Change 4:                                                                                                                                                                       | Change 4:                                   |                                                                                     |
|                                                                                                                                                                                                                                                        | Change 5:                                                                   |                                                            |                                                                                                                                                                                                            |                                                  | Change 5:                                                                                                                                                                       | Change 5:                                   |                                                                                     |

Household ID Male Respondent ID Female Respondent ID 

## 15. Gender Roles & Personal Values

Please indicate the level of agreement with these questions:

|       |                                                                                                            | 1 - Strongly Disagree | 2 - Somewhat disagree | 3 – Neither Agree nor disagree | 4 - Somewhat Agree | 5 - Strongly agree |
|-------|------------------------------------------------------------------------------------------------------------|-----------------------|-----------------------|--------------------------------|--------------------|--------------------|
| 15.1  | Women and men have the same right to make their own decisions.                                             |                       |                       |                                |                    |                    |
| 15.2  | A good wife should obey her husband even if she does not agree with him.                                   |                       |                       |                                |                    |                    |
| 15.3  | A woman has the same capacity to earn money as a man.                                                      |                       |                       |                                |                    |                    |
| 15.4  | Women have the right to live a life free of violence.                                                      |                       |                       |                                |                    |                    |
| 15.5  | The man should take responsibility for all of the family expenses                                          |                       |                       |                                |                    |                    |
| 15.6  | It's the woman's obligation to have sexual relations with her husband even if she does not want to.        |                       |                       |                                |                    |                    |
| 15.7  | The woman should be free to decide if she wants to work outside the home.                                  |                       |                       |                                |                    |                    |
| 15.8  | Men should have more time to rest and relax than women.                                                    |                       |                       |                                |                    |                    |
| 15.9  | Women have the right to defend themselves and to report to the authorities any mistreatment or aggression. |                       |                       |                                |                    |                    |
| 15.10 | Childcare should be shared between spouses.                                                                |                       |                       |                                |                    |                    |
| 15.11 | Women and men should have the same freedom for professional development.                                   |                       |                       |                                |                    |                    |
|       | In your opinion, a husband is justified in hitting his wife in the following situations:                   |                       |                       |                                |                    |                    |
| 15.12 | If she goes out without telling him?                                                                       |                       |                       |                                |                    |                    |
| 15.13 | If she neglects the children?                                                                              |                       |                       |                                |                    |                    |
| 15.14 | If she argues with him.                                                                                    |                       |                       |                                |                    |                    |
| 15.15 | If she refuses to have sex with him?                                                                       |                       |                       |                                |                    |                    |
| 15.16 | If she disobeys her husband.                                                                               |                       |                       |                                |                    |                    |
| 15.17 | If she burns the food.                                                                                     |                       |                       |                                |                    |                    |
| 15.18 | If she is having an affair.                                                                                |                       |                       |                                |                    |                    |

15.19 Have you received some training on these issues?

1-Yes  
2-No



Household ID Male Respondent ID Female Respondent ID 

We are interested in knowing which life-guiding principles or values you have that guide your choices and decisions. With that in mind, please rate the following statements based on your own personal values.

|       | Statement                                                                                                                                                            | 1 - Strongly Disagree | 2 - Somewhat disagree | 3 – Neither Agree nor disagree | 4 - Somewhat Agree | 5 - Strongly agree |
|-------|----------------------------------------------------------------------------------------------------------------------------------------------------------------------|-----------------------|-----------------------|--------------------------------|--------------------|--------------------|
| 15.20 | I actively seek out advice about agricultural practices for my farm.                                                                                                 |                       |                       |                                |                    |                    |
| 15.21 | If spouses (males and females) make household agricultural decisions together, their livelihood will improve (agricultural productivity, food security, income etc). |                       |                       |                                |                    |                    |
| 15.22 | It is important to challenge oneself and to learn and try new things.                                                                                                |                       |                       |                                |                    |                    |
| 15.23 | I highly value new agricultural information, technology, and weather information.                                                                                    |                       |                       |                                |                    |                    |
| 15.24 | Members of the community should work together to improve the community (maintaining common areas, infrastructure, etc.).                                             |                       |                       |                                |                    |                    |
| 15.25 | I am often one of the first people in my community to try new practices on my farm.                                                                                  |                       |                       |                                |                    |                    |
| 15.26 | When making agricultural decisions, I am most concerned about generating income.                                                                                     |                       |                       |                                |                    |                    |
| 15.27 | I am willing to accept agricultural advice from outside sources.                                                                                                     |                       |                       |                                |                    |                    |
| 15.28 | I make my own agricultural decisions without worrying about what other people say.                                                                                   |                       |                       |                                |                    |                    |
| 15.29 | My community is welcoming to new agricultural ideas and practices.                                                                                                   |                       |                       |                                |                    |                    |
| 15.30 | Co-operation with others usually works.                                                                                                                              |                       |                       |                                |                    |                    |
| 15.31 | Being a farmer is an important part of my identity.                                                                                                                  |                       |                       |                                |                    |                    |
| 15.32 | When making agricultural decisions, I am most (very) concerned about food security.                                                                                  |                       |                       |                                |                    |                    |
| 15.33 | I am capable of improving my life and the lives of members of my household.                                                                                          |                       |                       |                                |                    |                    |
| 15.34 | I trust members of my community to help me in times of need.                                                                                                         |                       |                       |                                |                    |                    |
| 15.35 | I trust my family to help me in times of need.                                                                                                                       |                       |                       |                                |                    |                    |
| 15.36 | It is important to me to be able to pass my farm/land on to my children.                                                                                             |                       |                       |                                |                    |                    |
| 15.37 | I feel a very strong connection to the land that I farm.                                                                                                             |                       |                       |                                |                    |                    |
| 15.38 | Men and women should have equal roles in agricultural decision-making                                                                                                |                       |                       |                                |                    |                    |

**Many thanks!**
